# Supplementary material for: AGS3 antagonizes LGN to balance oriented cell divisions and cell fate choices in mammalian epidermis
Source: eLife. 2023 Apr 5;12:e80403. doi: 10.7554/eLife.80403 (PMC10115442; doi:10.7554/eLife.80403)
Supplement: Source data 1. [file elife-80403-data1.xlsx]

## Sheet: Fig1
Figure 1C			Figure 1D	Gpsm1 1147 RFP+		Figure 1E
E17.5_All_WT	E17.5_All_LGN KO_Homo		E16.5_All_WT	86.884		E17.5_All_WT	E17.5_All_AGS3 KO_Homo
0.158	1.28		7.693	74.479		4.06	82.03
0.25	2.16		15.241	86.26		69.38	12.395
0.949	2.1603		7.338	79.046		77.4	63.705
1.234	2.17		76.174	26.073		74.01	19.558
1.6771	2.21		75.392	75.163		8.5	77.91
1.76	2.47		85.775	80.243		14.54	87.521
2.11	2.47		1.507	89.936		0.64	84.644
2.59	2.74		81.559	3.061		62.08	40.02
2.74	2.99		5.529	85.264		20.16	75.964
2.83	3.11		51.285	62.699		88.94	1.316
2.91	3.12		72.997	89.991		68.687	62.878
3.17	3.7225		76.812	80.783		3.012	66.95
3.411	3.88		82.644	6.847		17.8	62.42
3.301	4.0541		72.354	81.145		4.43	51.894
3.326	4.1034		62.157	11.339		3.5	15.59
3.49	4.3		32.104	14.826		77.98	12.69
3.53911	4.33		17.23	79.824		3.13	75
3.59	4.61		76.235	83.749		17.78	64.57
3.929	4.68		86.809	71.805		86.24	70.017
4.18	5.17		61.194	80.151		4.57	67.17
4.436	5.21		65.909	77.332		28.53	71.13
4.696	5.36		19.185	86.861		21.83	4.097
4.71	6.0142		48.614	89.242		68.023	87.93
4.953	6.3528		1.904	66.66		73.77	82.84
5.115	6.36		11.861	63.022		73.91	43.78
5.23	6.434		78.043	83.961		89.08	73.2
5.25	6.5868		81.831	83.832		35.01	78.72
5.254	7.1993		43.17	8.374		21.32	66.69
5.286	7.73		60.68	56.279		6.01	88.96
5.544	8.0179		6.318	88.253		11.468	85.271
5.63957	8.1076		87.994	8.917		6.24	87.5
5.991	8.3		75.397	72.446		3.132	77.24
6.003	8.42		1.438	86.329		83.03	8.09
6.02	8.58		72.375	82.775		27.35	72.21
6.205	8.7055		4.273	64.711		62.4	7.23
6.5381	8.9196		22.181	73.322		58.43	3.89
6.581	9.61		83.37	69.598		80.63	67.06
6.65	9.83		29.152			8.37	76.21
6.843	10			55.981		29.63	70.712
7.13257	10.11		20.692	71.102		6.42	87.514
8.745	10.23		3.048	89.048		64.03	7.574
6.96	11.0964		10.928	73.046		85.03	84.586
8.0158	11.31		7.787	87.551		66.49	25.86
8.02873	11.31		17.967	80.991		37.57	43.715
8.5723	11.59		8.176	72.264		68.89	73.22
8.977	11.73		84.549	71.474		78.03	88.51
9.21	11.89		4.705	67.277		79.37	87.12
9.038	11.89		3.362	61.554		16.074
9.79014	12		3.609	88.152		16.13
10.183	12.53		72.495	64.923		74.75
10.412	12.56		61.383	6.342		20.34
10.7871	12.62		63.459	65.528		75.87
10.82	12.88		56.524	75.024		21.12
11.94	14		86.532			89.35
12.821	14.36		75.743	88.7748		0.41
12.823	14.69		71.479	87.4795		69.09
13.391	16.14		65.811	84.9961		17.862
13.5033	16.2		7.97	86.0548		2.36
16.521	16.6724		64.564	4.97022		67.13
17.02	17.16		5.726	76.511		6.17
18.22	17.16		8.082	23.5184		75.42
18.362	17.79		67.75	87.8931		86.725
18.77	18		5.983	89.9258		12.041
19.12	18.13		77.691	86.542		82.716
19.612	18.5		67.99	86.5379		5.232
20.384	18.7595		3.739	89.4164		70.57
20.41	19.71		1.801	82.509		86.79
23.407	19.8		15.767	64.4824
25.15	22.08		2.924	64.4824
25.128	24.36		3.608	6.39659
26.45	25.1731		2.098	63.6339
27.026	25.2		5.969	89.6383
30.8123	26.51		82.878	82.025
34.257	27		6.824	79.2946
35.621	27.4		62.949	79.7576
37.0258	28.06		68.672	86.8711
43.242	28.1641		77.605	12.0649
47.1403	28.4		4.079	32.175
47.648	28.96		84.759	35.028
47.43	29.45		7.853	83.04
49.3814	30.0865		62.341	85.545
54.64	32.64		89.8	87.6383
54.901	33.2166		83.685	87.8998
56.412	34.75			84.3986
57.537	34.87		4.2	2.17564
58.34	35.3134		83.1	75.9987
62.47	35.76		1	6.25773
62.517	35.7711		7.1	89.9906
62.314	36.16		53.8	88.6614
64.221	38.5		84	89.8153
64.615	38.64		1	87.4172
66.47	39.17		39.8	64.5534
67.72	41.34		1	85.2637
68.534	42.82		83.7
68.458	44.22		1	56.256
69.914	44.5046		80.7	39.903
69.92	47.7		77.7	72.125
70.85	48.2906		85.2	77.783
70.713	48.92		89.7	89.946
71.66	52.4012		78.3	76.905
72.721	52.56		29	49.15
72.32	52.56		61.5	69.508
74.31	55.9339		1	40.803
75.216	60.87		33.7	70.498
75.374	62		49.6	63.818
76.531	62.63		2.7	84.393
77.057	65.2		1.5	67.768
77.379	67.68		84.6	81.389
77.542	69.66		1	75.865
77.41	72.5		85.1
77.791	73.6		84.1
77.516	74.04		86.8
78.97	75.6326		75
78.878	78.7084		63.4
79.132	80.3966		2
80.11	81.32		7.1
80.347	82		6.8
80.521	82		3.3
80.4462	82.6		2.6
80.6397	84.36		4.7
81.246	85.3336		82.9
81.1141	87.93		75.4
81.6457	88.22		89.5
81.752			88.8
82.17			28.2
83.267			3.2
83.61			14.3
83.94			6.1
83.8717			73
83.742			82.5
84.96			74.2
84.14			80.2
84.9641			68
84.54			88.1
84.6709			2.1
84.783			13
85.03			4.7
85.1874			82.9
85.4089			75.4
85.879			89.5
86.127			88.8
86.07			28.2
86.3541			3.2
87.09			14.3
87.2468			6.1
87.412			73
87.214			82.5
87.4507			74.2
87.567			80.2
87.75			68
87.78			88.1
88.2487			2.1
88.175			13
88.78			71.3
88.7476			89.2
88.871			6.4
88.91			73.5
88.983			5.5
88.8371			80
88.78			89.7
88.98
88.7481			4.7
89.187			82.9
89.5205			75.4
89.54			89.5
89.641			88.8
89.413			28.2
89.34			3.2
89.7609			14.3
89.843			6.1
89.6841			73
			82.5
			74.2
			80.2
			68
			88.1
			2.1
			13
			71.3
			89.2
			6.4
			73.5
			5.5
			80
			89.7

## Sheet: Fig3
Figure 3B		Figure 3D			Figure 3F
E16.5_All_mRFP1-AGS3 (OE)		E16.5_Gpsm1_KD_mKate2_Pos	E16.5_WT_mKate2_Neg			Absent	Apical	Unpolarized
14.2		13.555	8.871		E16.5_All_WT	26.6272	65.0888	8.28402
75.9			7.431		E16.5_All_mRFP1-AGS3 (OE)	2.27273	50	47.7273
81.4		25.499	86.105
6.12		83.399
88.7		21.523
71.5		6.489	18.653
32.2
7.9		79.006
88.5		40.136	88.147
2.3		1.499	3.592
83		68.118	8.056
74		50.188	3.564
58.2		31.626	81.17
2.9			68.934
80.2		2.516	73.234
82.01		58.873	9.224
85.2
26.1		0.064	10.675
3.1			68.743
5.3		86.925
88.2
2.7		61.559
51.3		17.45
1.8		50.272	81.777
			11.085
86.8
1		5.076
86.8			20.832
71.5		3.876	5.438
1		81.391
13.7
67.6
74.5			0.458
1		13.612
1		12.213
46.8		70.698	73.689
11.5		12.514	15.023
60.6		8.531	2.273
65.3			6.253
14.6		3.456
1			78.898
71.1		83.072
1		20.393
84.4		45.134	80.216
21.3		66.359
1.8		14.889
85		1.51	89.756
4.5		7.992
1.7		17.734	87.355
3			66.125
8.9		4.42
11.3		25.83
2.3		16.61	81.712
3		82.07	4.41
8.7		3.95
5.2		34.22	70.017
2.3		83.6	43.212
88.2		76.76	5.094
1.8		1.83	70.612
89.9
1.6		8.225
2		79.865	66.593
2.8		19.321	11.516
3.8			27.843
4.1		59.624
88.7		17.597	72.584
79		6.47	35.698
88		6.473	66.292
2.4		32.085	70.829
6.5
4.9		22.548
1.5		11.53	81.039
3		0.362	11.332
13.8			2.058
16.2		21.904	11.904
2.3		82.591	83.842
1		4.429	39.11
1.1		4.542	3.198
1.9		10.256
4.8		9.002	0.264
1.8		1.774	14.538
87.6		6.062
86.5		43.665	65.051
86.4		6.493
83.1		22.064	63.356
2.1			79.388
2.3
84.3			65.197
2.9			67.119
14.7			83.399
76.9			6.686
81.5			3.104
83.7			36.696
2.9			73.528
78.8			7.424
2.1
76.1			68.118
1.1			16.636
4.5			9.589
29.3			21.148
79.2			80.598
0.3			87.402
37.2
2.6			71.495
78			37.119
8.1			67.119
83.3			86.599
85.2			38.939
6.3			68.785
85.3			78.873
1.3
73.2			6.962
87.4			70.272
65.1			10.451
83.6			88.374
1.2			81.391
4.2			88.146
77.7			78.994
49.4			88.237
			69.059
			11.421
			84.462
			25.272
			17.721
			4.781
			2.058
			83.848
			88.757
			13.313
			0.155
			10.488
			15.074
			6.308
			13.505
			12.384
			5.392
			2.746

## Sheet: Fig4a
Figure 4A
	Absent	Apical	Unpolarized
E16.5_All_Gpsm1 1147 RFP-	30.5556	55.5556	13.8889
E16.5_All_Gpsm1 1147 RFP+	9.30233	69.7674	20.9302

## Sheet: Fig4d-f_RFP-
			Litter #	E17.5 (102413)	E17.5 (102413)	E17.5 (102413)	E17.5 (102413)	E17.5 (102413)	E17.5 (102413)	E17.5 (102413)		E17.5 (102413)	E17.5 (102413)	E17.5 (102413)	E17.5 (102413)	E17.5 (102413)	E17.5 (102413)	E17.5 (102413)	E17.5 (102413)	E17.5 (102413)	E17.5 (102413)		E17.5 (20509)	E17.5 (20509)	E17.5 (20509)	E17.5 (20509)	Or pos?	E17.5 (20509)	E17.5 (20509)	E17.5 (20509)	E17.5 (20509)	E17.5 (20509)	E17.5 (20509)		Out?	E17.5 (20509)	E17.5 (20509)	E17.5 (20509)	E17.5 (20509)	E17.5 (20509)	E17.5 (20509)	E17.5 (20509)	E17.5 (20509)		Not sure about this embryo	E17.5 (20509)	E17.5 (20509)	E17.5 (20509)	E17.5 (20509)
			Embryo #	R1_Pos	R1_Pos	R1_Pos	R1_Pos	R1_Pos	R1_Pos	R1_Pos		R2_Pos	R2_Pos	R2_Pos	R2_Pos	R2_Pos	R2_Pos	R2_Pos	R2_Pos	R2_Pos	R2_Pos		e1_Pos	e1_Pos	e1_Pos	e1_Pos	e1_Pos	e1_Pos	e1_Pos	e1_Pos	e1_Pos	e1_Pos	e1_Pos		e3_Pos	e3_Pos	e3_Pos	e3_Pos	e3_Pos	e3_Pos	e3_Pos	e3_Pos	e3_Pos		e2_Pos	e2_Pos	e2_Pos	e2_Pos	e2_Pos
			Image #	Series009_1	Series009_2	Series011	Series020	Series024_1	Series024_2	Series025		Series044	Series046	Series050	Series051	Series056	Series057	Series061	Series065	Series070	Series071		Series002	Series003	Series005	Series007	Series008	Series010	Series011	Series012	Series014	Series015	Series018		Series020	Series024	Series032	Series034	Series037	Series041	Series043	Series047	Series048		Series093	Series097	Series100	Series102	Series103
			RFP	Neg	Neg	Neg	Neg	Neg	Neg	Neg		Neg	Neg	Neg	Neg	Neg	Neg	Neg	Neg	Neg	Neg		Neg	Neg	Neg	Neg	Neg	Neg	Neg	Neg	Neg	Neg	Neg		Neg	Neg	Neg	Neg	Neg	Neg	Neg	Neg	Neg		Neg	Neg	Neg	Neg	Neg
				Background	Background	Background	Background	Background	Background	Background		Background	Background	Background	Background	Background	Background	Background	Background	Background	Background		Background	Background	Background	Background	Background	Background	Background	Background	Background	Background	Background		Background	Background	Background	Background	Background	Background	Background	Background	Background		Background	Background	Background	Background	Background
		Background		8.384	10.923	16.703	14.502	20.559	16.74	10.321		10.022	8.112	6.724	14.424	7.451	6.39	21.141	14.256	10.803	20.39		5.046	5.526	5.21	6.633	5.735	7.678	6.989	4.309	5.541	5.205	5.612		31.224	8.751	17.243	18.635	15.145	13.278	16.888	10.305	14.81		8.217	14.71	16.932	21.977	14.829
MEAN	SDEV	N	Round prop:	Means:	Means:	Means:	Means:	Means:	Means:	Means:		Means:	Means:	Means:	Means:	Means:	Means:	Means:	Means:	Means:	Means:		Means:	Means:	Means:	Means:	Means:	Means:	Means:	Means:	Means:	Means:	Means:		Means:	Means:	Means:	Means:	Means:	Means:	Means:	Means:	Means:		Means:	Means:	Means:	Means:	Means:
2.42527	6.81775	56	0	2.5159	1.67995	-11.3383	-4.7485	-6.51435	-6.27905	-4.02167		16.3448	1.074	13.3447	4.50167	15.4231	-1.54693	0.35555	-7.3536	-2.23283	-0.2645		1.78287	9.0213	-2.41017	4.43515	7.44207	2.94467	-0.8088	2.89507	3.11167	-0.722833	2.249		-10.683	3.4755	6.84277	19.2097	-5.7338	10.7286	-3.0241	8.70013	6.1234		-2.42057	-1.16573	-1.31887	-3.99467	-1.17127
3.44441	7.76373	56	0.01	2.09973	0.0520667	-10.8938	-3.85097	-4.45065	-1.99195	-4.2832		30.2128	1.6925	16.4171	7.72125	22.7637	0.0184	16.3108	-10.1957	-3.41175	1.78756		3.36362	14.7538	-1.63105	4.6368	2.95357	2.08817	2.11492	1.15535	1.25712	-0.72425	0.4816		-6.39562	1.04293	10.9128	11.863	-4.67722	2.89352	-3.89246	8.91295	5.33368		-1.4261	-1.23698	-5.02792	0.3465	0.47385
3.64881	8.16512	56	0.02	4.35313	5.09913	-4.9915	3.13983	-1.56453	6.05195	-2.0276		36.618	1.802	18.9324	16.9337	20.2849	0.2741	7.9148	-11.4671	1.415	-7.19357		1.47645	23.1915	-1.15705	4.37335	0.633133	-0.0665	2.42128	1.80433	1.72197	-0.32178	0.52925		-8.21092	-0.107167	8.51922	6.6068	-3.10648	4.79885	-2.77295	6.15045	3.12467		-1.62768	-1.40588	-5.49414	-1.81	5.73054
4.95174	9.11662	56	0.03	4.73077	5.86793	3.8658	8.3031	0.590125	11.8984	-1.10933		41.3954	0.16075	24.1928	19.8338	17.3017	1.07405	10.4886	-12.1055	6.67632	-12.7099		2.20316	21.1436	-1.69152	3.19931	4.09917	4.68167	1.1666	3.5423	3.02368	-0.47856	-0.6226		-6.54878	1.08127	16.7693	2.6095	-3.87896	3.01594	-1.9709	3.70725	0.472117		-1.17222	4.51342	-5.23355	-3.3935	4.04802
4.77847	10.0079	56	0.04	10.5228	8.72043	-4.5932	5.55837	2.9982	1.91488	2.0306		31.0701	0.959667	25.3387	51.8672	16.1712	-0.31538	3.7837	-12.3151	9.31482	-12.6092		1.98965	13.7689	-2.9182	2.59579	6.9874	2.22	3.5151	1.33028	1.475	-0.7649	-0.915		-2.54084	-1.29032	12.9966	-0.2514	-1.46868	1.76223	-5.07846	3.68543	0.380983		-1.15718	1.92562	-5.77318	6.03225	8.13185
5.07975	12.5821	56	0.05	11.8484	10.3164	-9.0355	5.7993	7.45282	0.9903	1.7872		36.0201	3.2055	27.5404	67.7083	18.0053	0.075425	2.3604	-11.7587	8.054	-12.7391		4.46812	24.9586	-2.32895	3.49661	4.89803	0.3595	-1.05652	-0.0572167	-0.316183	-0.527	-0.645		-13.7944	0.616517	14.2128	1.3645	0.81994	2.92345	-4.48442	0.777375	-0.364243		0.7015	0.58502	-1.99567	0.6205	5.55462
5.18085	12.2276	56	0.06	6.94187	9.33537	-6.5804	2.81613	3.05567	-1.56787	0.2262		31.3279	2.872	25.5047	64.1225	26.763	-0.25104	1.5061	-11.4177	6.31428	-9.69397		3.86357	27.1505	-1.61197	6.57057	4.3197	0.810833	-2.41774	0.826217	-0.7404	0.31104	0.7942		-13.7229	-3.51687	13.2496	3.9002	0.045	1.61266	-0.733725	5.89845	3.10433		1.69248	1.34848	1.21428	2.8954	3.72082
5.16647	10.5624	56	0.07	10.0733	6.7028	-5.1056	-0.00436667	0.960067	0.846275	0.4745		29.1357	4.85525	14.8115	45.4365	34.683	-0.402425	0.479075	-9.77412	3.12227	-11.0982		0.9955	29.0608	0.0733	4.34834	6.35166	1.48617	-2.49054	1.87728	-0.75562	-0.698475	3.14825		-13.998	-2.5748	6.57943	4.90825	-0.61414	3.5869	3.21938	6.12525	9.21751		0.304583	5.96465	0.22728	0.36025	2.95412
5.17203	11.0815	56	0.08	8.62887	7.07137	-6.84775	-0.722533	-1.26915	1.65345	4.6778		28.9139	4.69933	9.25207	61.3425	26.3509	2.51394	0.84735	-9.01764	3.41504	-12.6146		3.28666	29.6513	0.614933	2.96863	5.92394	1.35167	-1.44447	3.35342	-0.86998	0.26996	1.2634		-12.5034	-1.38256	1.43346	6.2762	-1.48544	5.48633	6.52084	4.48844	9.98447		1.56114	7.98194	-0.3358	2.8705	1.16536
5.29906	13.8524	56	0.09	9.83693	9.26317	-9.4666	-5.63273	-1.06725	2.2716	2.9316		25.3701	8.5795	6.70797	87.9663	30.37	0.5326	4.444	-10.9376	4.35492	-8.79244		3.18112	25.5867	-0.430117	3.7007	2.5251	3.18983	0.73154	3.22493	-0.587183	1.07286	-0.6492		-11.765	-2.22117	-0.622417	6.363	-3.82038	2.84512	5.17616	0.08	2.47216		3.16974	0.36326	1.70576	0.891	7.08933
4.71622	13.0165	56	0.1	8.14187	11.0225	-7.7014	-3.8015	-6.56048	4.03	4.5418		25.2836	12.8657	6.03327	76.098	29.4389	-1.96282	0.02395	-7.35066	3.26837	-12.5986		0.63152	28.3087	-0.81828	4.01613	1.17748	1.133	0.53178	2.1295	-1.41378	-0.3813	-0.4114		-6.11475	-1.36725	1.26642	-0.403	-5.41734	4.3173	1.6604	-1.01112	1.34275		1.07327	-0.7072	0.889517	5.0275	0.08824
4.54937	10.6174	56	0.11	9.5711	12.1439	-7.1275	-1.58203	-3.04803	2.29283	2.1112		14.3576	8.88075	4.62097	46.8802	25.9199	-2.09947	3.55475	-4.3482	5.79674	-11.6092		-0.021625	35.1728	-0.862317	4.80217	2.1448	-0.1405	0.786733	2.3805	0.4682	0.84722	0.11925		-5.58422	1.49758	0.48564	-0.3185	-4.73916	13.3611	0.1257	-1.89752	-3.52422		1.37268	3.28985	1.60182	0.0475	1.73718
4.92664	13.1192	56	0.12	8.84223	13.1143	-8.718	-2.37943	-4.35878	-1.51827	2.6828		7.4419	5.36067	5.57173	43.4232	17.4734	-3.01918	2.52463	0.57514	13.8087	-11.4624		1.19576	20.6833	-2.72287	3.54117	0.801857	-1.17583	-1.57496	0.98162	1.86364	0.23912	-0.398		-1.66532	0.327317	3.32362	-2.0022	-4.3693	14.197	2.73854	2.07432	-6.35627		2.62258	4.2037	5.8248	0.55525	8.12292
5.01323	15.5742	56	0.13	8.95513	9.90127	-7.9004	-2.4647	-1.3939	0.1184	3.16167		8.22436	6.4965	3.5777	44.1315	15.6613	-4.34318	1.3334	6.91828	11.9946	-11.2655		1.43257	9.67902	-3.59333	3.58835	1.70161	0.693167	-1.24376	1.08922	2.5231	-0.726575	-0.2734		9.4719	1.7959	4.22094	-4.6145	-6.79452	12.1758	7.49975	3.0532	-6.65552		5.9483	4.21494	-2.01722	-2.6538	1.68364
5.35264	19.6135	56	0.14	9.43813	9.99227	-9.02	-4.45987	-3.2023	0.13735	0.592		1.92664	2.81	6.1323	35.0083	18.7677	-3.3847	-2.03172	7.46542	14.423	-4.91868		1.40865	12.6083	-3.5042	2.96804	6.6937	2.416	-1.30415	2.38772	1.81474	1.05546	2.6588		14.9166	0.254833	-2.40172	-4.4914	-7.9893	3.87964	9.18996	9.25935	-3.34903		4.57684	-0.07018	1.12073	-6.7455	-3.27303
5.17656	19.0413	56	0.15	7.70843	16.6381	-8.5434	-2.37447	-2.02373	-0.608	-0.504		-1.19552	-0.62925	6.4948	22.4862	25.6991	-1.68972	-4.51245	7.40486	11.1689	-3.55482		2.20462	11.3614	-3.0503	2.13587	5.9778	1.49083	-1.27584	2.19934	0.41824	1.0186	5.5078		3.27382	-2.1429	-7.02484	-5.029	-5.33512	4.54085	6.32368	12.4104	-6.09377		9.07884	4.37758	3.8532	-6.43175	-0.63478
5.67278	17.0295	56	0.16	3.7365	18.0316	-7.6754	-3.1344	0.162725	0.31165	-1.2568		-1.74344	-1.19567	5.91843	21.578	19.0735	0.52702	-5.41625	10.4408	9.47142	-2.87892		1.8542	0.19836	-2.16978	0.933243	1.7535	3.49233	-2.16968	2.77683	0.165717	-0.13506	5.91575		8.25137	-0.227167	-6.17068	-3.3798	-5.6257	2.86563	7.05584	10.9586	2.2		6.92047	9.93634	26.105	-6.172	1.00552
5.65599	15.2609	56	0.17	2.09097	15.5836	-5.2285	-2.2516	1.43185	5.52193	-0.542667		-4.17844	-1.5985	6.59343	15.7045	11.8254	2.21835	-2.82643	15.8156	7.33736	0.394733		0.4711	3.69762	-1.5885	0.627725	0.836257	5.42983	-1.23713	0.143733	1.16272	0.57816	6.0426		6.42332	1.5419	-5.59027	-1.0745	-1.9592	0.31668	7.17787	8.36092	4.95533		12.0635	6.6624	10.9915	-6.15975	4.76052
6.5373	16.6477	56	0.18	1.86025	12.5762	-4.1878	-2.02077	6.19647	2.8796	2.5322		-4.60756	-1.56633	4.724	7.97875	8.22697	3.14098	0.299675	12.589	8.9563	2.2379		1.06862	3.03232	-1.75433	-0.3489	0.703086	2.5295	0.94038	0.695367	1.22994	0.457075	4.0958		1.87937	2.36002	-4.13732	9.5958	2.65578	4.18928	8.57098	10.5566	0.129867		12.0195	5.63544	13.1698	-2.77825	20.4025
6.16506	16.2261	56	0.19	5.777	13.4269	-3.7004	0.0586667	8.5436	1.9056	-3.1994		-3.68898	-3.516	4.59917	11.042	10.8178	3.67478	1.13513	4.49424	3.88732	0.5906		2.40958	0.07308	-1.36023	-0.3412	1.68852	1.771	-0.63306	1.09778	1.2425	-0.32318	0.4178		-8.14404	1.64548	0.15766	6.02675	4.59323	9.21468	6.00048	10.6642	2.01579		9.80083	7.97972	20.8404	-0.132	28.1761
7.18339	17.6924	56	0.2	11.0104	15.2531	4.58175	0.4936	8.0579	-0.69505	-2.9682		-4.81552	-4.292	4.09788	5.845	9.05128	2.75584	-4.4248	7.65835	7.96168	-1.99454		2.35672	-0.0477	-1.46664	0.836413	2.18263	4.0448	0.0565	0.647617	3.76385	-1.59516	0.98525		-13.2457	0.467217	-2.48823	9.2716	7.80074	11.0531	6.19108	6.535	17.6301		6.49324	6.38765	28.4924	-3.78475	50.1486
8.35177	19.4271	56	0.21	8.69473	11.8146	4.4814	-1.4288	5.5362	-1.20227	-1.3882		-0.78938	-3.248	4.9643	3.92725	13.6623	1.90145	-8.95117	11.2384	24.2815	-1.7526		4.7509	-0.39356	-2.287	0.702557	3.39109	3.388	2.30274	0.159283	11.4945	-1.12288	0.905		-10.4283	-0.10288	-6.58326	8.314	7.98604	12.0895	4.57962	9.59908	17.8163		3.62142	2.53498	36.7377	1.95275	56.6607
7.79723	16.4717	56	0.22	16.5641	7.4768	10.9842	0.173233	-0.602175	-1.6624	-2.3848		2.89644	-1.1	7.1774	1.594	11.3125	2.0856	-7.66402	15.8438	24.8768	0.78046		6.37688	-0.77	1.38183	0.359643	2.94587	4.41533	1.54512	2.12125	7.27292	-0.92622	-0.4902		-0.416417	-1.00915	-4.84885	10.5466	6.41513	5.92587	4.43452	10.5829	5.89035		5.4927	9.52478	33.4357	1.17075	39.5655
9.4125	18.0419	56	0.23	3.3567	15.5492	14.8465	-0.684967	3.10432	-2.98592	-3.167		6.00412	-0.246	7.5116	4.466	13.5111	1.02878	-9.67115	22.2373	54.9764	-0.4118		13.4465	1.01708	0.899933	1.21996	2.91238	6.95267	1.04055	2.78992	10.0847	-0.77634	0.7286		1.44004	-0.48015	-1.71118	14.4417	0.21588	8.89772	5.83502	6.247	-0.560357		11.0575	13.8071	19.1524	-3.27525	28.2008
10.5018	21.7941	56	0.24	6.65337	19.2023	23.8136	-2.81127	4.5314	-3.4587	-1.6572		3.55934	-0.163667	12.1369	1.5615	12.7606	2.33046	-10.6141	18.7201	57.1035	-4.16294		12.0251	0.54998	0.526717	-1.36947	1.83771	5.6125	-0.67492	2.57293	9.98712	-0.88995	2.213		-5.6926	0.0690667	-2.01012	7.529	1.5145	12.0161	7.39532	9.31648	1.31258		14.2375	16.1847	20.5442	-2.75775	23.8876
9.49211	17.6949	56	0.25	8.28545	26.0264	12.673	-1.2693	9.9427	-2.7423	0.5156		-0.891875	1.22125	16.3536	-1.7695	11.7208	3.7479	-11.3291	15.1143	37.4741	0.974317		9.91188	1.22252	-0.145883	-2.14939	1.8309	9.43333	-0.71702	1.59467	11.7723	-0.92284	4.80025		-7.14124	2.54438	-4.0035	0.33525	-1.89558	20.0764	8.17155	9.14508	2.2123		11.9874	15.8807	22.0907	0.0596	13.3338
8.64033	12.7559	56	0.26	6.47343	27.1116	0.5878	-0.889767	12.6314	-1.25632	-0.2242		-1.39188	6.495	15.1824	-2.25325	11.6044	3.37242	-12.932	23.4578	28.9539	3.97054		8.40687	3.86956	-1.75892	-0.978343	3.00419	13.8807	0.38084	-0.0354833	15.4912	0.025	7.4308		-9.42906	6.80907	-2.33942	-2.13375	-1.14678	18.6312	10.1205	8.9012	5.02806		7.44192	16.6708	31.1636	11.4585	8.4098
10.7277	13.8921	56	0.27	8.4547	33.5602	3.678	0.169667	9.4578	-4.73215	-1.453		-3.10914	11.4883	13.3416	-3.16975	10.9221	2.83418	-10.615	25.7	31.3576	-0.10578		6.17965	3.62795	0.2296	2.23634	2.71855	27.825	1.25378	-0.61532	31.2711	-0.83148	13.8436		-5.0042	7.63958	1.53682	-2.47	-3.7522	11.042	11.7313	14.758	10.2546		10.7134	17.4282	39.2139	17.3573	8.81976
13.6103	17.9876	56	0.28	13.9726	35.2616	3.1194	2.95287	4.87765	-0.923925	-0.4395		-0.30386	26.905	10.5148	-3.24525	15.3737	5.13108	-6.43015	29.253	73.6539	6.00394		11.2867	3.58714	1.84363	5.79934	3.6977	42.4228	1.93792	-0.6213	30.5085	0.10018	16.0214		-2.06242	4.1307	2.99592	-1.26025	-4.02984	1.06352	4.40498	25.466	25.1275		11.4559	17.8384	22.4995	10.4525	11.1022
14.6281	19.073	56	0.29	17.1142	35.772	6.2272	-0.0743333	6.82963	2.29585	-0.5016		1.0686	43.4673	9.86773	-1.74825	14.4457	3.0417	-5.20655	33.7222	53.3274	19.9145		14.4185	2.9318	-1.07435	5.16081	5.82337	42.7958	0.72628	1.19308	18.8604	2.70345	22.5358		1.06262	3.63868	0.1222	0.9644	2.6378	-4.27848	4.01772	27.3675	20.1361		14.0242	17.3617	27.0139	21.1155	8.91768
15.1547	18.7159	56	0.3	29.4237	33.6786	9.79875	3.0884	7.9287	5.72448	-0.3302		1.17226	48.5067	13.5829	0.0336	13.5569	3.9269	-3.04845	24.2549	24.8436	12.2585		17.1437	0.557317	0.04622	3.16103	2.85761	36.8677	2.28643	0.3737	28.7937	6.07174	19.5912		3.16458	2.10668	0.20165	2.63175	9.12784	-3.59712	11.8855	34.3142	10.5799		12.7425	11.5194	36.7661	33.236	7.9557
16.1462	17.6381	56	0.31	22.4748	30.3083	26.7838	9.21137	14.1789	7.5927	-0.7962		0.51004	59.0037	13.0014	1.8335	12.8206	4.8107	0.10315	29.7379	14.4948	2.63604		18.7411	0.05726	0.635483	2.94265	6.78465	44.5642	2.76642	1.05314	17.1353	9.1547	28.63		3.83593	1.6081	5.56342	4.3308	10.0561	4.69454	28.2838	39.6676	13.322		7.28414	2.47582	43.0125	41.3506	4.24872
19.9939	18.959	56	0.32	19.3384	25.1173	48.8324	19.7356	22.4506	6.06545	-1.6454		1.20232	52.3887	11.3694	7.1335	10.9869	5.502	5.41475	28.1299	18.8513	2.31512		20.1621	1.54242	3.54845	4.95836	14.0341	57.825	10.1952	1.50485	15.5161	13.997	47.1312		6.30214	9.28997	16.7611	0.04825	5.35128	24.6776	22.8838	32.6662	14.854		8.83316	8.6896	56.8425	56.4915	11.0409
22.3906	22.4916	56	0.33	16.2687	27.3838	53.508	19.1724	36.2828	11.0724	-1.28517		0.52288	48.6027	13.5085	3.86525	9.42413	8.82062	12.9791	17.3074	8.21836	1.87352		11.5775	1.85615	8.48897	9.35941	16.2077	114.414	10.5286	1.64548	13.9901	25.8552	57.7342		-1.9914	4.97104	33.1705	9.7194	13.1123	31.2628	14.6926	16.9121	7.38447		11.9001	8.74578	56.0763	46.3492	11.2921
24.135	25.5885	56	0.34	22.6709	31.5529	51.4998	20.7518	38.3993	12.6539	-0.3178		-1.9631	80.9947	18.1259	4.7945	7.79662	10.8042	10.4886	8.51753	11.3604	2.69276		10.7334	4.22228	12.3115	17.0207	15.6831	129.683	11.454	5.6627	13.3486	31.5794	56.5473		-7.2118	1.08992	48.0541	21.131	11.9932	22.9781	9.65854	18.8858	9.03473		12.3968	5.43694	25.7657	42.724	15.3252
22.8586	22.6452	56	0.35	22.5926	23.8036	34.3184	27.8693	36.618	15.4423	1.1616		-0.18056	87.6007	21.6762	1.99225	9.65983	13.2148	13.6862	9.00634	10.4255	2.42628		10.9121	3.84164	8.06623	17.2506	17.2568	72.152	13.7457	12.2753	13.7812	36.3309	66.1128		-4.55563	0.88845	47.522	3.5728	9.67502	13.4896	14.0784	24.6449	15.0786		12.0674	35.8502	7.3836	44.086	11.3193
22.2856	22.2924	56	0.36	23.1376	21.8973	19.86	22.3155	44.2564	23.271	2.6956		-2.54176	73.0183	27.9275	4.2385	12.7161	13.8189	8.53065	6.81042	7.3574	-0.86176		8.3444	6.29783	7.71993	17.2235	24.2341	47.4617	20.2773	9.93992	11.0933	33.8604	83.0978		4.49588	-0.608033	42.2254	-9.42625	12.9029	31.0903	18.3901	32.2865	13.6431		12.777	37.0921	14.9067	54.8805	-4.07197
24.2853	24.2994	56	0.37	20.095	33.0562	26.3628	21.319	41.3101	24.6108	3.206		-2.98126	61.1837	26.3638	10.039	13.1596	11.0061	2.52988	1.94332	5.04162	0.528783		11.0262	4.01954	7.74503	7.30726	34.9359	31.9312	19.5875	13.2282	13.7797	34.2146	89.8314		17.1486	1.07818	64.9363	-7.3468	9.50177	68.0063	27.4112	34.4731	21.4257		8.46808	27.9697	23.2777	53.355	-7.4072
25.8452	26.592	56	0.38	27.9929	58.8743	64.803	19.8146	36.9056	35.1837	-0.347667		-2.46748	60.5615	23.6731	14.192	17.5114	11.1383	1.0637	-0.44916	4.45338	-3.54866		11.6725	4.0606	7.03032	16.2282	38.7959	22.4095	14.3407	14.254	13.7978	40.0423	85.635		22.1805	0.64468	59.203	-4.398	12.2959	70.0085	16.7822	45.6524	23.352		4.88192	17.2474	19.0139	55.014	2.97523
25.3507	25.5359	56	0.39	33.2711	61.7878	95.7772	22.1065	30.2499	34.1205	-0.8522		-4.04088	47.0283	25.8057	17.9758	18.32	13.8532	5.50575	-2.0456	5.38932	-6.96848		14.4709	3.4989	8.78402	19.7363	35.6706	20.9473	5.28383	16.4541	10.8772	36.3844	61.6737		17.933	-0.801783	51.532	12.6846	14.1072	60.499	6.12604	25.1073	28.8779		8.96505	28.2288	20.3267	94.3302	1.69098
24.7386	25.7844	56	0.4	35.5794	52.9293	95.0178	21.0965	26.7533	18.2	2.6954		0.63908	28.5192	20.1191	26.2686	16.194	18.4567	9.13153	-2.48714	3.65177	-5.82007		16.9111	1.82844	12.4142	14.4944	34.9831	9.3944	11.8591	16.5918	10.0812	38.8821	55.4102		17.9299	-1.31248	31.1012	62.8435	21.5513	63.9214	4.0959	12.7927	27.1042		13.8887	33.8353	22.1816	130.418	-2.59868
26.257	28.8127	56	0.41	32.6325	59.7328	32.583	26.8549	19.2099	14.9345	6.334		5.9491	32.2737	18.2743	20.71	15.2579	29.4683	2.81118	-1.87248	1.39794	-6.15092		13.973	1.44098	11.493	7.40149	40.9747	14.141	21.4695	19.2801	14.8799	35.0895	53.0872		18.3726	1.05867	25.8375	96.9628	29.7323	49.6727	3.09608	11.6169	20.7982		8.58142	41.8436	25.9561	160.526	1.00023
26.6592	30.2036	56	0.42	44.3874	56.2266	49.5842	35.6335	8.16142	7.6296	10.498		3.31414	28.819	19.7377	16.037	14.7201	33.1767	5.44185	-3.40186	-0.02178	-5.81496		22.4886	2.35837	13.8596	5.63347	42.7611	23.5707	19.5998	16.4854	25.2888	25.2023	52.7468		20.3917	3.76504	19.0138	94.497	27.9462	41.2442	-0.43162	12.0205	10.2508		10.0467	43.1103	27.2469	169.22	5.96058
25.5219	25.0019	56	0.43	46.4673	42.6337	55.5384	45.3442	5.0795	6.39835	19.7468		-2.478	15.0517	17.9942	15.1247	11.1449	27.03	6.539	-5.04337	-2.0204	-5.34148		28.8229	3.52526	17.7484	5.75545	32.2377	33.8873	26.6115	16.5071	25.2073	19.5072	42.585		23.9795	7.37038	10.9393	71.262	32.4215	61.0983	3.76994	14.3894	12.8836		8.59676	17.6994	20.7832	120.857	11.6946
26.5006	24.0776	56	0.44	46.0824	43.9881	52.1696	54.94	-0.153475	8.84607	29.1278		-1.03454	22.843	21.658	12.352	13.5795	17.9701	8.18148	-1.7051	-2.28724	-5.44345		31.5511	3.79552	23.7772	11.6915	20.2784	31.0153	29.1469	18.4831	16.1125	18.5014	24.6654		15.282	10.1834	5.25128	67.1535	39.052	66.6888	13.3048	11.9061	22.8571		10.5688	6.38816	32.2779	98.8038	6.5001
26.475	26.5551	56	0.45	45.5766	58.7859	20.5238	50.26	6.1871	8.47495	35.515		1.12878	38.512	21.4373	12.0425	13.1547	18.9117	3.56815	-0.95032	-1.91142	-6.52004		22.3432	-1.15768	29.9075	7.48246	14.602	22.8005	13.5484	13.0367	14.516	21.9716	19.9838		8.79562	16.6261	1.41716	49.6622	35.9227	64.1352	28.5437	22.4429	32.0221		21.1833	2.8611	41.4215	110.204	7.36984
25.8229	29.0174	56	0.46	42.9631	60.1362	8.586	48.1091	9.60417	10.9909	45.6784		2.23716	27.8475	25.1701	15.6593	14.0114	15.4307	2.53188	-3.59426	-2.23438	-5.9697		18.5294	-1.32128	21.9371	4.99336	7.55254	18.8975	7.65968	11.7285	8.42968	25.7358	16.0222		4.12547	22.5174	-3.245	31.9742	27.4719	54.9011	36.3982	25.605	34.9874		23.9772	3.26558	22.4913	128.541	6.92477
24.0812	29.0751	56	0.47	50.8884	73.3265	4.6238	34.3012	2.70025	6.4121	62.003		5.20248	23.6183	24.9309	15.8945	11.392	14.4189	3.9254	-2.93652	-1.36722	-5.12432		16.7077	0.28208	10.5609	4.56536	6.17446	11.1948	6.87824	9.7287	5.24006	33.9308	13.0336		9.57782	23.2832	-5.96254	23.8078	25.3987	40.1662	23.3214	25.4339	41.3506		26.6352	4.79708	9.39786	147.544	3.91586
21.9437	30.6709	56	0.48	51.0675	72.4047	2.87175	20.1604	-2.9888	2.06065	96.4343		5.46384	12.2725	35.0701	15.558	15.37	13.9947	1.60415	-4.14607	-1.39818	-6.30285		11.1338	3.10807	12.3031	2.1125	6.71923	5.1775	6.89465	6.52548	2.53525	39.6652	6.7265		10.7591	23.9974	-5.06752	12.6215	28.6441	13.7247	19.6984	32.8705	50.5025		13.2691	-4.1387	3.2867	165.431	2.54474
21.4062	29.9246	56	0.49	50.744	68.1758	7.0948	13.004	-2.32083	-1.7225	117.188		4.94764	2.24667	39.6382	13.7182	15.3261	22.9198	0.016575	-4.01828	3.0075	-9.76806		11.7299	2.5169	15.9147	2.37524	3.91579	3.46733	8.85006	8.97722	1.4918	40.5143	5.8618		15.6581	13.175	-5.39678	10.4772	36.0384	7.00812	15.0306	46.0715	32.5436		12.9524	3.9047	9.14422	129.549	9.23188
20.6556	30.6554	56	0.5	41.1223	57.7378	6.1914	7.0022	-2.74447	-2.41873	112.468		4.92454	7.10175	43.3088	14.1046	10.4976	24.5184	-3.1603	-2.65484	10.0823	-11.6442		7.68474	2.5557	12.1746	1.15755	5.32771	7.2645	7.81932	7.41194	3.121	24.6366	5.5784		18.3939	13.7083	-0.80408	1.5155	35.4657	6.18393	16.2829	42.5801	16.4003		16.8642	-1.46815	9.79868	121.303	5.75876
17.6113	24.3831	56	0.51	38.9618	29.2428	2.9948	7.97213	-5.57545	-4.94587	61.5886		11.9273	0.972667	50.1585	14.2097	12.0733	29.9701	-5.75482	-2.71992	16.9596	-11.4019		8.19525	1.37346	12.3143	2.64339	4.48709	13.1592	9.47752	5.52623	7.569	24.5616	2.9652		13.2418	18.8208	7.0413	0.9182	29.5843	7.84618	20.622	31.2115	14.7481		17.5293	-2.09414	-1.509	109.475	0.709433
16.1743	22.4536	56	0.52	36.4203	27.6448	3.689	3.34503	-3.84105	-5.66785	73.4005		17.641	1.8755	56.2727	17.0095	16.4042	24.3315	-4.84992	-3.83218	21.3348	-13.5817		6.85496	-0.206583	4.97352	3.58934	1.41165	11.043	7.43323	7.25382	4.47448	25.406	3.984		7.7028	19.1524	3.72004	-0.999	17.9331	6.06048	6.6032	25.182	23.121		21.1893	-3.14918	1.79273	90.445	-0.66246
14.7127	20.075	56	0.53	29.8714	19.6871	0.5676	10.0973	-9.26058	-2.40092	75.4006		15.755	1.69067	60.4208	18.2157	11.4376	16.4877	-8.8451	-3.1777	31.8395	-12.3044		4.0901	-0.86078	4.07467	2.78089	1.90944	4.85533	7.8986	7.98477	2.62158	27.0491	4.4652		26.6293	15.2543	-4.819	2.098	15.9789	-0.0529	4.6031	21.6766	27.4817		21.0824	-5.4395	3.2972	62.45	4.17892
13.098	17.0579	56	0.54	28.7225	18.1029	-2.9842	14.357	-9.11483	1.4477	43.4798		19.4039	2.234	50.3301	17.0838	13.7708	14.2591	-7.25882	0.12058	22.4012	-13.1367		6.801	0.78354	3.89538	0.383125	1.70383	0.547	10.0786	8.12648	7.20286	26.1312	2.0734		34.3741	20.4283	-8.47225	-1.33425	13.4789	2.75212	5.35342	20.6446	24.2183		19.5329	-3.062	13.7727	26.4762	6.8476
11.1337	14.9815	56	0.55	25.9732	24.0907	-6.32875	13.5916	-7.07892	0.597575	28.9472		24.6457	3.11967	34.5426	18.1557	11.2448	10.2947	-3.02325	-0.17212	13.8018	-12.5754		7.44402	0.266933	1.92613	0.404771	0.9952	3.614	10.3966	4.53615	8.32757	19.2249	0.851		25.847	26.3072	-8.57382	7.2048	9.09515	1.22437	0.63362	21.5265	40.0136		13.4553	2.33716	1.54827	6.67425	-1.60088
9.94689	15.952	56	0.56	26.1416	31.0116	-6.7728	6.14913	-7.80665	1.9718	22.1844		20.1047	2.8965	23.141	19.6932	9.1629	11.0932	2.41235	2.09778	6.98774	-13.4145		1.63772	0.53288	-0.249417	0.4176	1.95873	4.58417	0.6711	2.79052	6.00142	10.6412	0.898		17.7609	41.2257	-5.80474	4.052	6.49616	-4.6536	1.24972	23.7346	45.0509		11.5183	0.5749	-6.74472	-5.1044	3.1677
9.71196	18.2045	56	0.57	22.2927	30.242	-8.387	-2.65127	-7.83243	1.78405	33.7518		16.4299	3.51333	16.487	33.1045	6.6373	8.26696	1.1093	-1.74523	3.20365	-11.7342		0.01278	1.91666	-0.432433	0.04285	5.9151	4.35133	3.02242	2.07502	6.08008	8.17445	-0.24925		15.3727	54.6971	-6.85415	-1.275	7.64972	-4.5091	4.4954	16.6485	42.5642		8.80902	-3.08838	-7.3291	-3.376	9.76103
8.41613	17.267	56	0.58	20.2174	31.6577	-8.75875	-1.5472	-5.73208	2.70975	43.4303		16.7323	0.30425	13.2419	43.5417	7.0971	4.28225	-0.937275	-6.80796	-0.35858	-8.99986		0.672275	0.991317	-1.29257	-0.637186	3.36046	2.36033	-0.26515	1.78736	2.45388	7.68476	-1.048		5.67564	44.5781	-6.6477	1.127	1.07247	-4.14423	8.53176	15.2431	35.4782		3.0069	-4.59292	-7.8935	-0.83075	0.14872
6.95803	13.6774	56	0.59	13.566	36.0354	-9.16	1.23777	-5.88883	3.4531	28.766		13.3291	0.360333	19.26	41.9425	6.8599	3.48482	1.52863	-8.54204	-0.76202	-9.6052		0.87685	-0.56048	-0.980683	0.421986	2.50727	3.9395	-1.96896	-0.21605	4.78193	8.43804	-1.0282		1.22822	24.8331	-2.90453	-2.8286	6.1626	1.04933	4.4559	15.0138	4.54303		4.89348	-2.9749	-4.20385	1.26675	-4.49953
6.42425	12.6972	56	0.6	16.0771	50.7083	-7.4702	0.723133	-6.77183	2.37795	12.9848		7.52752	0.236	16.1312	21.921	6.98658	6.31113	-0.013625	-6.86172	-2.07258	-8.93935		0.60104	0.19136	-1.80992	2.53069	2.1654	0.18	-2.56682	0.232933	14.504	3.01885	0.8572		-5.17164	6.78295	-3.56962	1.69325	5.04012	19.2669	-1.55883	16.2456	3.10814		2.16458	-5.12274	4.72704	1.34	-5.23216
5.46	12.5178	56	0.61	22.7491	55.6893	-3.9455	2.78477	-5.23323	-0.943625	2.6466		7.6273	1.747	12.2249	10.4695	8.75088	7.22428	-4.74555	-8.5493	-3.94	-6.99516		2.3385	0.505483	0.175217	3.75882	6.20806	-1.984	-1.43312	1.36888	5.68056	5.23864	1.0745		-7.307	1.78575	-3.5083	-0.4676	7.2706	11.0069	-6.2327	14.2982	3.8407		6.28865	-6.91242	-1.61557	2.62975	-4.50404
4.77926	12.6525	56	0.62	12.1686	50.7001	-2.8178	-0.0843667	-8.05068	1.2368	-1.5385		8.19508	4.04725	10.4757	9.44275	10.423	7.19725	-3.64187	-7.97014	-3.42494	-9.70954		2.5102	0.37786	1.03555	2.89433	12.3448	0.599	-1.3052	2.34606	2.30964	4.97038	0.2066		-10.7821	-0.969283	-3.55652	-0.6155	7.29854	-1.25072	-8.10338	17.2439	13.6674		8.6824	-5.61812	-8.31078	4.5975	-2.85192
4.46564	11.2917	56	0.63	10.2408	32.5616	-4.8546	0.4105	-9.86005	0.605675	-4.7266		8.52016	6.27767	9.18405	3.898	18.5428	6.53528	-1.62322	-8.05116	-5.24435	-10.6845		2.92298	1.08202	-0.212767	0.545814	17.9586	3.613	-1.13582	-0.188233	2.87955	5.96122	3.9706		-13.1949	-1.5121	-0.85496	-0.3904	5.05135	-0.05028	-8.37718	17.0683	14.3019		7.56278	-0.65655	-7.92122	5.5944	4.03884
3.8385	8.53897	56	0.64	6.7429	12.5831	-5.341	1.4724	-10.1912	4.9609	0.3768		6.03592	6.14775	9.92683	2.808	23.6476	3.2946	1.41533	-4.92838	-4.49138	-12.7097		2.58352	0.672217	-0.855617	-1.10396	14.8954	5.25767	-1.13407	0.00166667	4.60748	6.17686	5.562		-10.7844	-1.39232	-0.711933	-0.866	-0.44862	-0.473017	-5.90064	20.9721	17.528		5.04498	1.08284	-5.33268	5.6185	9.52842
3.23731	7.02572	56	0.65	4.52807	7.07097	-3.2184	4.53873	-10.3115	5.90338	-0.1052		3.8181	4.527	10.8068	4.43175	27.0547	1.73764	8.1032	-5.1727	-3.8084	-9.88862		2.60496	1.67068	0.494633	0.0612375	14.3511	5.80567	-1.30014	-0.18668	4.38882	4.68145	10.1252		-9.60908	-2.6957	0.72868	-0.0234	-1.25822	0.264283	-4.64264	16.787	7.13024		8.45262	-4.75572	-2.29243	0.2255	10.2941
2.74267	7.00381	56	0.66	4.35437	3.5766	-3.033	1.6172	-11.2161	11.2618	-3.2602		5.09108	2.73025	6.70887	0.99925	28.3939	2.41605	6.42705	-5.4928	-1.3696	-9.58348		0.41825	0.8334	-0.780033	1.22589	14.8153	0.985833	-1.1076	-0.3521	3.03942	5.2277	3.0495		-8.00754	2.77762	1.77908	2.65375	-0.2234	0.1927	-4.39024	17.8046	-0.0682167		11.286	-4.27816	-2.81692	6.20825	9.1525
2.91982	6.47833	56	0.67	4.03433	3.8075	-8.2655	1.67433	-10.4196	6.79133	-2.87		7.88414	0.885333	8.92837	-0.2735	21.4597	2.19648	8.80843	-5.23388	1.26206	-7.91818		0.19365	0.604	-1.17692	-0.363586	19.0161	1.08067	0.901783	1.35587	2.72276	4.46936	1.1228		-3.08583	7.15628	2.69492	5.1568	1.91932	-2.40472	-4.7408	19.1057	5.12479		6.38613	-1.11023	-3.33356	14.7185	4.25362
2.55866	7.15518	56	0.68	2.7933	-0.867333	-6.2976	-0.797167	-10.1807	3.04645	-2.28117		6.97868	7.33	4.96893	-3.29	20.7227	2.47035	5.14873	-6.09568	3.0669	-9.59026		-0.46858	1.33032	-1.47887	-1.95441	27.0757	0.359667	0.938	0.69015	3.68396	1.48272	0.8552		1.29856	2.17422	1.71864	5.54825	-3.82768	-4.36622	-6.19604	22.0106	10.3346		-0.41876	1.48152	-4.43857	5.792	1.81948
2.32017	8.30439	56	0.69	4.08447	1.894	-6.07	-2.9527	-10.7807	-2.25957	-0.341		9.10066	7.82233	7.1781	-4.8815	23.4913	6.00406	1.02095	-5.23526	0.83875	-11.4746		-0.332825	-0.1777	-1.40097	-2.05166	36.7612	0.681167	-1.58002	0.17026	6.49428	1.09186	-0.1584		3.02857	1.5108	2.29672	2.7592	-5.3077	-4.3189	-3.92932	22.8353	-0.20225		-2.48026	-2.49836	-4.375	3.217	3.55498
2.41547	7.97747	56	0.7	3.1286	0.4303	-6.328	-4.901	-12.3918	-3.36922	3.4018		6.45382	6.6965	7.29727	-2.6804	20.4058	3.89728	-0.75525	-7.64482	-0.89996	-12.3911		-0.8995	0.237683	-2.5846	1.09164	28.0024	0.223667	-1.7586	1.77457	7.57377	0.96118	1.16175		0.8215	3.62448	9.25147	0.90575	-5.91818	4.17005	-1.90986	24.5575	0.232829		-0.98135	-0.99382	-6.01477	8.232	3.96402
2.99208	8.21829	56	0.71	4.34773	-0.9089	-5.2948	-8.04163	-13.6064	-5.0206	0.2236		5.74982	8.68633	8.98827	-2.11975	17.4221	2.98816	0.3864	-5.8691	-0.65302	-10.451		-1.14333	-1.22578	-2.9759	5.10214	21.1009	2.29967	-2.17378	3.16328	6.98874	2.28052	6.656		1.0489	4.21068	11.4801	-0.0954	0.514183	4.81908	-4.494	31.4183	3.92558		-0.1816	-3.01714	-2.8174	7.2625	2.65664
2.15183	7.48645	56	0.72	5.20507	-0.1835	-3.59	-6.30393	-14.3148	-6.64262	0.932667		4.34812	5.832	10.369	-1.434	20.5815	1.12975	-1.0842	-4.28948	-1.19495	-11.6141		-1.52332	-2.50842	-3.04492	2.12997	18.1655	1.8255	-0.8081	1.71675	1.8425	0.154	6.127		-7.30124	4.82473	11.4451	-2.115	2.81096	-2.31153	-3.2828	16.51	7.75127		0.64378	-4.21933	1.2208	3.30925	12.1455
1.58897	7.48133	56	0.73	5.148	3.86183	-2.7785	-3.8067	-13.1731	-9.8177	5.189		7.57822	5.15067	10.2648	-3.39325	23.4824	3.2273	1.14518	-4.8736	-2.24326	-11.3294		-1.02558	-2.49908	-3.48628	-1.30194	7.98292	2.47033	-0.5632	2.73506	3.87125	-1.06594	4.9432		-10.5793	4.03938	8.64256	-5.681	-0.753483	-4.18422	-2.10508	13.5115	9.35398		0.0510333	-3.30294	-2.84444	9.0965	13.4221
1.29224	7.0457	56	0.74	9.5531	3.2939	-3.7154	-2.147	-10.8004	-10.1396	7.1836		6.08466	5.47225	9.89323	-5.5455	18.0684	5.22297	-0.642875	-7.0894	-1.7998	-12.754		-1.51058	-1.31298	-2.73665	-0.921543	5.85501	0.65	0.34772	1.66318	2.82812	-0.671125	5.4642		-9.61576	6.38755	6.5862	-7.2875	-3.6236	1.23958	-4.22528	9.8775	4.5579		2.68064	-2.1463	-3.76028	12.8738	5.646
1.17811	6.75756	56	0.75	10.3887	1.58627	-6.5632	-3.1419	-12.8855	-11.6839	9.4814		11.4135	6.41475	11.1638	-2.39475	12.052	6.24235	4.45845	-3.33382	-1.28943	-11.7491		-1.44874	-2.26192	-2.68067	1.08316	5.71714	-0.519167	2.00862	1.27543	3.3501	-1.58748	3.79125		-12.0195	3.16492	0.5187	-3.6305	-6.2067	3.24892	-6.04665	11.969	0.151417		2.64084	-4.03194	-0.520733	9.282	5.81738
1.21284	7.06302	56	0.76	11.6976	-1.62527	-6.244	-1.9599	-12.854	-9.0281	4.6768		13.805	5.655	10.3888	0.4735	14.2516	4.38266	2.40395	-5.69436	1.6496	-10.8073		-0.999775	-2.18366	-2.09843	2.42761	5.84644	-0.0925	1.88444	1.72653	4.905	0.335875	3.3226		-15.6612	-1.10532	3.48056	7.4968	-6.18833	9.62683	-5.10698	11.7547	0.820567		0.0601167	-4.21378	-4.51568	1.1045	1.6836
1.98216	7.65873	56	0.77	12.6787	1.7032	-4.76625	-2.35457	-11.3814	-8.98655	4.1582		9.28606	2.96825	8.35207	-3.537	14.6567	5.73663	-2.5002	-6.03226	0.81478	-13.3866		-0.44422	-0.829	-1.5424	5.07551	4.03382	1.45433	1.53272	0.49434	1.99498	-1.38312	4.0942		-15.5215	0.2369	7.63994	20.1045	-7.4094	11.8809	-5.78878	14.286	8.16123		-0.52276	-5.55604	-1.16637	16.6737	5.61362
1.88303	7.12741	56	0.78	13.7682	-1.5243	-5.5802	-1.86823	-10.5593	-8.73875	1.91533		3.06956	3.58933	7.42127	-5.472	11.4187	5.61666	0.272525	-5.89224	-1.3528	-14.1967		0.54975	-1.80902	1.24452	3.11509	1.22837	0.126833	2.01626	2.65898	2.07592	-0.26482	4.12		-14.245	0.269083	5.14647	16.0454	-5.63335	9.20037	-4.21836	12.2689	10.4853		0.50326	-6.71402	1.71416	6.5105	0.718083
1.66468	7.62533	56	0.79	6.61417	-1.78697	-9.844	-3.4393	-10.6794	-8.82127	7.4188		0.24986	2.8255	7.15867	-5.48125	10.8094	0.829375	1.00718	-4.597	-2.11288	-12.6421		0.353925	-0.5358	2.4458	2.2813	5.30014	0.361167	1.24832	1.50358	3.2169	1.19005	2.0728		-15.9216	-0.2583	4.12128	12.1377	-5.90472	9.4291	-8.60135	14.9486	8.0471		-1.08595	-3.8065	18.2075	1.09175	3.34324
1.03781	6.13433	56	0.8	6.47477	0.766267	-8.00275	-1.45047	-9.86198	-7.80355	2.3164		-1.59552	6.30967	7.90242	-5.1754	13.1075	0.37928	-3.73465	-4.22038	1.34076	-12.1278		0.86592	0.5451	2.36208	1.2789	7.97216	-0.5538	1.28558	0.219867	2.40568	1.54738	3.77925		-16.9738	0.620417	5.69783	-0.2958	-4.40956	6.40894	-5.51754	14.9835	3.42723		-2.18754	-5.46248	11.7448	-1.2485	0.9641
0.913063	6.49368	56	0.81	3.66903	0.791333	-10.221	-5.783	-8.72565	-8.02747	2.4082		-1.99032	10.3327	7.10297	-6.46375	16.684	3.3258	-5.1501	-3.24626	-0.396425	-12.6558		0.61425	0.57852	0.682683	4.2832	3.96697	0.3855	2.5322	1.44452	3.03412	5.44124	4.2712		-17.9998	0.373483	8.28174	-9.7885	-1.42952	5.00777	-0.15436	15.2537	0.906529		0.185267	-5.8592	-3.00862	7.0376	3.4829
1.04019	6.82129	56	0.82	3.48032	-0.125067	-9.6898	-6.17913	-7.5104	-7.9907	0.571		-0.89	5.74267	4.79603	-5.198	14.4712	2.5054	-6.33015	1.50116	1.73864	-9.55752		0.8159	-0.55186	1.38432	9.49193	4.46924	2.52767	1.55458	0.995467	3.46998	5.20887	4.456		-18.9088	-2.14733	6.64418	-11.887	-2.61104	3.7858	-6.72092	10.4813	1.95328		-0.7935	-2.58236	-3.90494	13.8717	3.20868
0.701747	7.43592	56	0.83	1.00823	1.1523	-12.004	-8.19743	-10.0572	-10.1323	0.0141667		-1.15578	1.14625	7.84487	-6.67675	12.0558	-0.472275	-5.07993	1.73582	1.65506	-7.0491		0.71012	-1.37862	0.750317	0.34495	1.69356	4.76217	2.03962	0.0422333	3.10786	0.01874	4.124		-21.1617	-1.52492	7.68355	-11.5905	-0.542167	5.23562	-5.7242	10.1488	5.31982		0.84886	-2.52364	-4.87835	22.1053	0.378617
1.26062	7.89206	56	0.84	2.86937	0.6287	-9.4758	-8.60633	-10.7486	-8.86362	-1.4118		0.42112	-0.77	8.82087	-1.177	19.2507	-0.9916	-5.5172	-5.69712	-1.09313	-8.32644		2.4344	-2.39318	-2.02762	0.766543	2.34851	6.97883	0.2799	1.01815	2.70118	-2.58498	3.06025		-21.2577	-0.3592	4.37888	-9.5926	-1.5495	7.66873	-3.14174	12.5338	-0.908486		3.69832	-0.35836	-4.33466	26.4722	1.39066
1.07235	7.59829	56	0.85	1.67933	-3.31843	-7.8454	-8.9512	-10.248	-5.99372	-3.1262		0.65288	-1.353	6.6812	-4.01925	20.1452	-1.55345	-6.18242	-5.26708	-1.29508	-12.0181		1.83534	-1.40904	-0.485133	-0.571586	3.01465	4.41133	1.20316	0.95028	5.69328	-1.93435	3.2208		-19.4937	1.73158	7.48008	-9.7865	-1.96808	7.54707	-1.56178	11.267	-0.295067		4.5396	-0.722325	-1.48645	22.7883	9.20522
0.35258	6.64424	56	0.86	0.140933	-3.4327	-8.67625	-9.1187	-10.9895	-5.27602	-2.6944		-2.61004	-1.60767	13.2411	-5.726	20.5893	-0.71486	-0.156175	-5.86562	-0.394	-13.1278		4.21542	-1.48583	-0.3709	-1.67517	2.14953	0.5835	1.99882	1.96215	7.49218	-0.6348	2.878		-15.6328	1.80425	3.19422	-8.765	-2.51482	3.12774	-3.46022	8.87023	3.3901		6.7543	-2.37008	-4.57943	10.3475	4.24697
0.445626	6.87534	56	0.87	2.73653	-0.0571333	-5.7248	-8.19113	-10.0494	-5.85795	-4.6058		-4.46594	0.3715	12.7829	-7.0915	21.6748	-0.6798	3.3438	-1.78828	-2.67398	-13.1061		3.95367	0.93422	-0.6107	-1.86572	5.5886	2.12317	0.9861	0.345567	3.58877	-0.626575	2.9934		-16.0355	-0.419317	1.47872	-6.07975	-2.74918	8.614	1.36517	11.7557	-1.19178		4.2168	-2.23388	-9.59694	12.2222	7.82704
0.976499	6.64375	56	0.88	3.9558	-0.0388	-7.42	-8.47077	-8.56363	-5.2984	-5.6165		-2.63102	0.221	18.1438	-6.7995	21.1401	-1.98286	7.39563	-0.82996	-2.7291	-9.09376		3.24362	1.38106	1.1242	-0.511486	1.92004	2.49867	2.33476	1.26542	2.61944	-1.21524	2.8806		-12.3808	1.07238	5.40635	-5.32	-2.7817	6.78528	0.21182	11.7302	-4.5279		3.57282	1.86276	-6.85713	9.9666	6.41753
0.377435	5.93778	56	0.89	2.10202	-0.962867	-6.8485	-7.06823	-7.55278	-3.7495	-4.6114		-2.46428	-0.43875	16.1007	-6.50775	15.027	-2.88915	0.19445	0.703833	-2.89024	-9.49058		3.11592	0.929333	2.45312	-0.675486	0.7506	0.0015	1.13552	2.24123	2.09816	-1.06066	1.6835		-4.91722	0.25225	5.91496	-5.96225	-3.8809	3.43008	-4.95816	14.9765	-3.26277		4.9999	-2.71955	-4.22876	7.59475	-0.46018
0.614967	5.91663	56	0.9	1.14973	-3.63743	-8.7804	-6.86875	-6.3992	-4.6607	-3.7784		-0.94304	-3.05133	12.527	-5.5772	16.5576	-0.04134	1.25495	-1.40462	-0.8954	-9.63573		4.10338	1.00992	0.44834	-0.600214	-1.08345	1.51717	1.37248	2.02527	2.44326	-0.3459	1.5354		-7.28922	0.578483	10.684	-4.6174	-2.23274	4.57625	-5.58778	5.51598	-0.237333		2.73805	1.42616	-6.87043	9.30925	6.18592
0.43124	6.77215	56	0.91	1.43567	-0.7117	-4.1784	-6.73873	-5.53293	-5.4102	-5.0038		-3.48642	-2.164	17.8629	-5.07625	16.941	2.97963	5.50075	-1.74384	-0.60108	-9.5684		3.73105	0.41912	1.28552	-2.33642	-1.30534	0.6125	2.44816	0.77395	0.476183	-1.681	0.1714		-11.7458	0.2772	5.23518	-5.0725	1.57078	6.06484	-7.82768	4.23687	4.53394		1.59136	-2.10632	-9.85636	16.3758	-2.49875
0.238823	6.65248	56	0.92	1.22613	-0.1997	-1.75775	-5.32187	-2.27288	-5.7172	-5.2662		-3.2519	-4.26733	18.4543	-2.202	12.823	2.03414	6.87718	-3.38328	-1.05296	-11.1408		4.65616	-0.149617	0.660117	-1.64426	-0.839957	1.26767	4.00813	1.38194	1.53082	-0.6814	1.1266		-12.0624	0.25094	9.85588	1.3868	-4.53476	4.02667	-9.50654	3.1198	1.38583		0.55606	-6.71324	-11.1044	10.064	-2.26128
0.590524	6.73304	56	0.93	1.19767	-0.638	-3.4756	-4.12057	-4.02467	-5.95867	-2.83667		-1.99184	-4.84575	22.1282	-1.97225	15.7218	1.92955	6.2189	-6.75703	-0.65765	-11.3198		5.05975	-0.43348	-0.809183	-2.1819	2.26747	4.30117	1.77562	1.70947	2.3504	-1.54258	2.81725		-11.7147	0.11235	13.2438	8.8965	-9.87444	2.38912	-9.57434	8.61032	1.02567		0.942067	-4.6599	-5.86974	0.73825	-2.02957
1.90554	7.91614	56	0.94	3.46003	0.777633	-2.9512	-2.7795	-6.43148	-4.5999	-2.0854		-0.3006	-5.28833	25.3274	2.31775	22.4841	-1.16248	2.60843	-2.13124	-1.8644	-9.99527		3.74618	-0.23096	-0.211017	-1.47459	4.42942	7.5225	0.52816	1.5532	3.56296	-1.55584	4.741		-9.11036	2.38243	22.9376	16.4504	-6.96005	8.33616	-8.42248	16.2344	3.69133		3.1015	-6.73626	-4.5864	13.5264	-0.90236
1.82294	8.09026	56	0.95	3.04713	-2.1941	-6.33725	-3.2268	-2.46555	-9.34947	-1.6092		0.84336	-3.92775	26.0461	2.34375	26.5587	1.00698	0.530275	-4.21558	-4.3121	-5.36174		4.22506	-0.6174	0.09865	-0.420314	2.11981	-0.270667	0.797433	2.42612	2.66638	-0.4748	2.7272		-7.08982	1.77937	15.3093	12.045	1.2799	14.5985	-9.18408	17.3496	3.4221		2.58966	-5.20406	-7.67327	23.831	3.60992
1.22895	7.07965	56	0.96	3.33375	-3.775	-8.266	-4.3431	-2.38183	-8.69215	-2.0714		0.59934	-3.069	20.7783	0.353	23.7608	-1.37426	-2.7103	-7.84602	-5.18375	-7.03148		2.99297	-0.06068	-0.0984167	0.192871	1.72296	0.6745	1.78436	1.4219	0.84794	1.07277	-0.452		-9.48186	6.1956	10.8642	12.7258	1.46402	10.9012	-7.05332	12.919	2.27805		-1.7101	-3.32282	-7.27504	14.9552	3.09778
0.331988	6.34165	56	0.97	4.77807	-3.6821	-7.7634	-4.30873	-2.76773	-9.88795	-2.5642		-1.63776	-2.98275	16.4789	-0.717	17.5853	-2.00723	-3.5625	-9.62384	-2.59508	-4.68298		4.74752	1.8431	-1.00587	2.84271	1.1085	1.08417	-0.46112	-0.0577667	1.84482	1.01482	0.2874		-9.9186	6.95533	11.4054	6.91375	-3.26552	3.27868	-8.8992	13.5621	1.22817		-1.05036	-1.21188	-10.931	16.274	-4.36338
0.316708	5.82544	56	0.98	8.02333	-2.17223	-5.329	-1.36637	-2.35238	-7.86145	-0.1395		-1.38818	-3.15367	14.0278	-1.20375	10.5225	1.16944	-5.82885	-9.40168	-0.88458	-8.05683		2.62753	3.24783	-0.708483	3.7994	1.43453	-0.174333	0.986533	1.48385	-0.318633	0.26474	2.00825		-10.7587	9.13618	10.9741	13.3734	-7.64566	3.13673	-6.43413	12.2789	4.5176		-1.37752	-0.39275	-10.447	5.4755	-4.87202
1.37263	6.29634	56	0.99	9.99393	-3.11763	-5.644	-2.68507	-1.04865	-6.8056	-2.1564		1.4281	-2.64175	11.5359	-0.4355	13.827	0.526825	-1.31277	-9.28216	-0.987625	-8.2375		1.24635	5.2447	-1.24012	3.84984	5.93993	-1.27517	-0.02908	1.93567	1.9048	-0.3499	3.613		-6.20275	10.2499	10.2983	20.9657	-8.2107	7.92742	-5.10064	13.8366	1.4249		-1.93425	1.77012	-9.38948	-1.5835	-3.41628
2.10944	6.37361	56	1	7.25365	0.96755	-8.871	-4.90585	3.93855	-2.11485	-3.28033		3.8504	-1.731	14.6513	-0.937	11.1156	2.85447	5.76305	-7.3678	-0.5818	-7.22073		0.245333	4.61087	-1.99783	4.02895	4.3803	1.65333	0.522733	1.0757	2.059	0.5944	1.59067		-4.3794	9.63753	5.5683	22.3113	-8.2165	8.95853	-0.798967	14.7182	1.70427		-2.7616	-0.3454	-9.39403	4.295	-6.51607
			MAX	51.0675	73.3265	95.7772	54.94	44.2564	35.1837	117.188		41.3954	87.6007	60.4208	87.9663	34.683	33.1767	16.3108	33.7222	73.6539	19.9145		31.5511	35.1728	29.9075	19.7363	42.7611	129.683	29.1469	19.2801	31.2711	40.5143	89.8314		34.3741	54.6971	64.9363	96.9628	39.052	70.0085	36.3982	46.0715	50.5025		26.6352	43.1103	56.8425	169.22	56.6607
			MAX - background	42.6835	62.4035	79.0742	40.438	23.6974	18.4437	106.867		31.3734	79.4887	53.6968	73.5422	27.232	26.7867	-4.83022	19.4662	62.8509	-0.475517		26.5051	29.6468	24.6975	13.1033	37.0261	122.005	22.1579	14.9711	25.7301	35.3093	84.2194		3.15012	45.9461	47.6933	78.3278	23.907	56.7305	19.5102	35.7665	35.6925		18.4182	28.4003	39.9105	147.243	41.8317
			SUM	1448.51	1864.41	426.112	430.261	34.5355	78.6695	945.182		641.761	1091.17	1634.75	1169.5	1621.34	568.429	46.6751	11.1927	699.225	-702.697		566.136	416.015	212.144	309.511	869.065	1071.01	343.045	357.017	640.367	786.991	1124.81		-183.098	534.423	712.498	747.026	418.204	1199.45	298.133	1583.95	1003.87		634.821	395.025	700.045	2694.61	587.294
[truncated: 14 more columns]

## Sheet: Fig4d-f_RFP+
			Litter #	E17.5 (102413)	E17.5 (102413)	E17.5 (102413)	E17.5 (102413)	E17.5 (102413)	E17.5 (102413)	E17.5 (102413)	E17.5 (102413)	E17.5 (102413)		E17.5 (102413)	E17.5 (102413)	E17.5 (102413)	E17.5 (102413)	E17.5 (102413)	E17.5 (102413)	E17.5 (102413)	E17.5 (102413)	E17.5 (102413)		E17.5 (102413)	E17.5 (102413)	E17.5 (102413)	E17.5 (102413)	E17.5 (102413)	E17.5 (102413)	E17.5 (102413)	E17.5 (102413)	E17.5 (102413)	E17.5 (102413)	E17.5 (102413)	E17.5 (102413)	E17.5 (102413)	E17.5 (102413)	E17.5 (102413)	E17.5 (102413)	E17.5 (102413)		E17.5 (102413)	E17.5 (102413)	E17.5 (102413)	E17.5 (102413)	E17.5 (102413)	E17.5 (102413)		E17.5 (20509)
			Embryo #	R1_Pos	R1_Pos	R1_Pos	R1_Pos	R1_Pos	R1_Pos	R1_Pos	R1_Pos	R1_Pos		R2_Pos	R2_Pos	R2_Pos	R2_Pos	R2_Pos	R2_Pos	R2_Pos	R2_Pos	R2_Pos		R4_Pos	R4_Pos	R4_Pos	R4_Pos	R4_Pos	R4_Pos	R4_Pos	R4_Pos	R4_Pos	R4_Pos	R4_Pos	R4_Pos	R4_Pos	R4_Pos	R4_Pos	R4_Pos	R4_Pos		R2_Pos	R2_Pos	R2_Pos	R2_Pos	R2_Pos	R2_Pos		e1_Pos
			Image #	Series001	Series004	Series006	Series007	Series012	Series014	Series018	Series019	Series023		Series042	Series043	Series052	Series059	Series062	Series063	Series064	Series067	Series068		Series001_1	Series001_2	Series002	Series004	Series006	Series007	Series010	Series017	Series018	Series029	Series033_Pos	Series038	Series039	Series041_2	Series045	Series046	Series047		Series063	Series065	Series066	Series070	Series071	Series072		Series004
			RFP	Pos	Pos	Pos	Pos	Pos	Pos	Pos	Pos	Pos		Pos	Pos	Pos	Pos	Pos	Pos	Pos	Pos	Pos		Pos	Pos	Pos	Pos	Pos	Pos	Pos	Pos	Pos	Pos	Pos	Pos	Pos	Pos	Pos	Pos	Pos		Pos	Pos	Pos	Pos	Pos	Pos		Pos
				Background	Background	Background	Background	Background	Background	Background	Background	Background		Background	Background	Background	Background	Background	Background	Background	Background	Background		Background	Background	Background	Background	Background	Background	Background	Background	Background	Background	Background	Background	Background	Background	Background	Background	Background		Background	Background	Background	Background	Background	Background		Background
		Background		18.532	20	12.563	7.43	9.853	6.476	15.299	13.538	12.615		12.872	15.047	6.761	9.279	20.35	17.515	10.652	10.964	9.847		7.013	4.848	7.214	11.991	8.981	9.412	10.723	10.241	21.856	10.079	15.821	18.763	16.365	16.857	8.18	11.211	6.04		14.936	12.727	7.449	8.144	12.063	16.23		7.079
MEAN	SDEV	N	Round prop:	Means:	Means:	Means:	Means:	Means:	Means:	Means:	Means:	Means:		Means:	Means:	Means:	Means:	Means:	Means:	Means:	Means:	Means:		Means:	Means:	Means:	Means:	Means:	Means:	Means:	Means:	Means:	Means:	Means:	Means:	Means:	Means:	Means:	Means:	Means:		Means:	Means:	Means:	Means:	Means:	Means:		Means:
2.2635	8.55395	86	0	-10.4673	0.4366	0.23615	10.7688	7.86683	0.820167	-3.00333	-1.80865	-3.56967		8.44433	-8.50667	7.553	0.0764	-4.6618	-10.8395	7.87333	-0.414233	-3.51467		8.03633	4.38367	11.8317	-3.4845	-0.972067	0.910833	0.0619667	3.14475	-13.4257	0.0982667	10.9392	-3.109	-0.808	-6.921	4.259	-4.71233	2.15967		8.6864	23.1511	1.072	1.9795	22.637	-10.6523		5.89767
3.04917	8.07967	86	0.01	-10.2336	-4.06343	1.40932	11.5128	6.05317	3.00238	-2.17325	3.21075	0.302		3.5416	-5.0555	9.96475	0.02776	-7.93798	-11.919	9.0628	-1.0382	-1.35983		6.88375	5.81575	14.2154	3.99488	1.12182	3.35757	-1.29513	7.89962	-11.643	0.34548	8.9468	0.593	8.5412	-2.3884	4.84875	-1.6915	5.9582		11.8641	21.8823	2.152	0.4315	24.5255	-8.0629		5.7652
3.66179	7.81119	86	0.02	-9.62082	-7.8856	0.0678	11.7803	4.93616	6.1142	5.8436	5.23487	-1.749		-0.0096	5.1806	15.3935	1.80226	-9.95672	-10.4121	6.8072	-1.83383	2.55483		5.38525	5.05975	8.4719	5.8477	0.00372	2.04572	2.31417	5.31457	-9.7742	-0.25875	6.21693	10.0446	17.6565	0.7506	7.9082	0.6846	6.1674		12.358	24.4267	2.51025	-0.1045	22.0982	-4.36562		4.77375
4.11262	8.6693	86	0.03	-4.94833	-8.90477	0.3049	11.6083	3.62416	5.85712	18.3772	7.45987	-2.1252		5.791	0.88625	11.0015	7.18348	-7.1393	-10.4913	2.9606	-3.23758	5.98883		6.3004	3.7345	2.5255	0.117383	-0.31608	2.82935	6.18155	3.3692	-7.8924	0.98986	2.88195	14.0453	22.0946	-3.2266	5.22725	0.243333	4.03		22.7313	25.1424	4.2155	0.122333	22.2622	1.41272		8.9279
3.85682	9.15803	86	0.04	-3.4168	-9.11225	1.6419	9.4981	3.25018	2.88224	18.419	9.31035	-0.009		9.40717	0.1728	18.7043	7.25736	-4.16388	-9.37572	2.5334	-4.13622	1.8458		4.747	3.221	-0.96134	-2.90814	0.168825	4.0101	3.271	0.28205	-7.452	3.32344	5.27683	6.482	18.7408	-1.55	3.7858	-2.3246	2.5994		22.5923	7.15527	3.23225	1.0775	19.8126	-0.6305		7.0755
3.78799	7.58434	86	0.05	-0.748375	-5.376	2.28868	9.0708	3.20254	3.02255	11.2582	10.9731	0.47025		4.6554	2.93625	16.883	2.4357	0.897775	-8.80837	3.5992	-2.3753	2.66467		4.2676	1.7818	1.03845	-3.36627	3.3842	0.152175	2.64165	-0.44405	-3.3756	3.8681	5.99378	1.8752	11.7488	-1.8078	7.7358	-2.04017	2.2896		15.0838	2.7582	3.67	3.24333	13.0201	-4.02278		5.07995
3.70802	7.35622	86	0.06	0.4901	-5.42873	4.1678	12.6835	8.09725	5.95574	9.0982	11.2776	-0.7245		1.5012	4.96325	17.9338	3.18436	11.3986	-8.17826	4.9296	-0.809933	3.32017		4.8855	1.07675	2.52254	-3.19905	3.03922	-0.007925	5.24952	0.482933	-1.4396	6.27888	9.9247	0.456	15.7623	-7.0636	7.85	-0.1118	4.3324		22.8501	6.26152	1.6676	5.24275	8.00493	-5.4805		4.45765
3.89097	7.57787	86	0.07	1.08397	-5.9842	3.97575	12.1569	10.1095	8.6998	2.70025	8.01843	-2.6936		0.3406	5.208	16.1723	4.84738	14.779	-6.52862	7.4938	-1.17496	1.8836		1.54825	1.36725	0.26085	-2.0218	-2.94447	3.62494	10.239	3.15852	-1.3402	10.3161	5.44618	0.1046	18.058	-9.4524	8.7278	3.02183	2.3666		25.008	9.3022	2.922	9.356	6.65037	-3.48257		3.65388
3.5563	8.55331	86	0.08	8.08298	-9.31127	3.4284	9.96473	11.3271	7.14282	5.0342	1.03853	-3.83575		-1.1956	3.61725	13.6005	0.22152	4.93154	-7.56838	9.8576	-2.10847	-2.49217		1.5264	1.071	0.907875	-1.81058	-4.61978	7.76105	10.5085	5.00833	-0.424	14.7228	-1.75442	-4.00783	24.098	-7.3908	14.035	1.1514	0.7666		27.7294	13.8359	6.21575	4.47433	4.31043	-4.95928		3.8971
4.06059	9.81685	86	0.09	16.3463	-4.48433	2.81237	11.0696	15.4636	7.59237	7.6635	1.7078	-2.62325		-1.5952	4.0052	15.0685	2.74452	0.90635	-7.15148	9.7952	-1.42485	-2.54917		0.75125	2.5665	-0.67234	-4.0096	-4.19248	5.97647	8.6083	1.63443	-1.0102	14.6991	-1.9681	-0.7618	19.358	-8.29	14.9068	-0.499833	1.159		24.2375	15.3955	7.71175	4.4005	6.48647	-4.9884		5.79533
3.95702	9.59246	86	0.1	14.8495	-3.6762	0.738333	8.9204	12.7218	7.81896	3.915	1.37392	-4.3884		-5.5582	6.14775	16.0305	0.7899	-3.22484	-6.8649	9.7078	0.46085	-1.42167		-1.571	2.5608	-0.7615	-3.0955	-4.034	3.51472	3.8604	2.29118	-4.2886	12.0911	-3.52502	2.37817	14.8185	-8.6768	15.9992	-1.178	1.5858		27.9348	11.0673	1.59325	2.35833	4.35347	-3.59572		6.7293
3.81479	9.48556	86	0.11	12.5172	-3.1389	-0.306875	11.5623	7.23042	10.5416	9.9618	2.08643	-5.75275		-5.7332	7.1158	17.8067	2.6469	-5.41803	-5.0683	5.3248	-1.38228	-1.0952		-3.1002	1.979	1.43512	-1.72846	-4.60248	3.42096	4.56375	2.63035	-7.041	12.6103	-0.78468	6.753	3.6992	-9.7416	17.4912	-1.3455	-1.2046		35.734	9.84652	2.3755	0.71875	3.54972	-4.91488		4.06138
4.36583	10.2457	86	0.12	11.3074	-0.672075	0.305567	14.0002	1.2901	7.83748	12.35	-1.18943	-6.4255		-3.3958	7.3295	12.1288	0.03058	-5.36032	-3.56832	5.7488	1.77127	-1.73533		-1.687	0.2595	3.76735	1.18898	-4.9829	4.50305	3.18	4.07228	-5.6696	12.1227	1.22093	-4.91733	-0.5412	-11.9734	32.6418	-2.0358	-1.2392		33.8646	15.3	3.7005	0.6935	7.46373	-1.58132		2.96245
5.01306	11.1652	86	0.13	6.99205	0.143033	0.93915	14.4949	5.28082	5.50788	17.0614	-5.166	-6.8965		-2.503	4.65	15.901	0.5432	-3.68385	-4.16308	6.0408	7.85893	-1.86133		-2.725	0.04925	2.4085	0.06756	-5.66442	4.91465	-1.96018	1.45578	-6.4232	12.2318	-5.43555	-5.83167	-1.1368	-11.108	41.4917	-4.19267	2.363		39.2642	17.9371	6.5114	1.611	8.2644	-1.12885		3.67837
6.01273	13.4507	86	0.14	8.80818	2.99117	1.78673	11.1059	7.93928	3.08848	20.3613	-4.39247	-8.027		-3.27	0.83375	18.0817	2.11926	-0.5452	-3.12173	4.5968	8.2386	-2.951		-2.3522	0.9434	2.86067	-5.25415	-5.0203	6.63186	-0.947725	8.36525	-7.749	11.1971	1.29665	1.2294	-4.00175	-9.2986	63.7598	-5.08217	6.528		39.9174	9.05312	10.5135	5.12275	11.9619	4.69504		2.5254
7.91103	16.6991	86	0.15	10.8205	4.12007	2.2092	16.8362	5.86414	7.95152	27.8636	-3.18317	-7.95225		-1.2124	-0.9062	28.7617	0.39934	5.02427	-2.0156	3.4094	5.78428	-1.341		-1.056	1.01925	2.61632	-5.21238	-5.46876	7.39447	-0.404675	17.479	-8.564	10.7419	-0.420875	-2.81617	1.5116	-8.3724	76.6063	-4.566	1.7986		58.9041	9.57287	6.82625	12.8227	9.06265	-1.22928		2.95618
8.49272	18.102	86	0.16	13.5526	1.138	2.76707	17.7095	3.68046	4.39292	54.1636	-3.04895	-7.02		-4.4292	-1.1995	23.5268	0.6774	9.8157	0.38888	2.954	8.56385	0.206		-0.039	1.60125	3.0486	-4.68898	-5.28233	7.69647	2.01975	13.1713	-12.5556	11.526	12.7965	-5.3728	5.4888	-9.9738	89.6392	-3.9825	0.1576		76.2446	11.0666	2.66375	15.0195	9.75185	-4.5059		0.9411
8.60978	18.6281	86	0.17	13.5704	-1.87183	-0.26565	30.6269	0.8004	9.87368	79.741	-5.1237	-7.0856		-4.9026	1.806	15.8448	-0.70776	6.6121	0.53966	6.21925	10.0168	0.820667		0.547	1.1725	4.20254	-2.7219	-0.83936	8.4337	5.47674	11.2317	-13.1738	6.69698	1.90177	-6.267	8.733	-7.2072	70.9477	-5.0064	-0.0376		70.5437	18.8236	2.00475	6.06175	10.3625	-1.66126		2.1608
8.24392	19.3529	86	0.18	18.2466	-5.14323	-0.604567	27.6504	2.01468	7.93867	93.8006	-6.39158	-6.7925		-3.814	1.362	14.476	-0.3055	10.0724	-3.46028	5.513	10.5684	1.77183		0.24125	-0.0775	6.67537	-2.26806	-2.97532	7.13836	8.35745	5.39303	-11.561	5.68338	-5.3885	-2.484	3.9185	-5.151	67.6594	-5.83267	-0.6982		58.7201	19.592	-0.1135	3.002	8.41712	4.01828		3.71745
8.29534	18.478	86	0.19	11.0839	-2.8137	2.42022	20.0638	0.14085	12.8098	110.465	-6.16743	-5.0935		-2.7664	1.11575	19.2905	0.68014	18.9391	-8.52854	1.9354	13.0185	3.4994		1.2542	-0.1342	3.59532	0.201333	-1.7567	3.82225	11.3876	1.89485	-7.17	10.1202	-5.0147	-4.5225	-4.1874	-5.9416	61.618	-2.8954	0.2478		40.5475	18.5557	0.1442	6.8965	11.4941	-4.9736		6.03533
8.82293	16.8283	86	0.2	11.3008	-5.299	3.56413	10.9284	-0.16098	11.5845	85.2327	-4.0547	-4.2865		-3.0838	5.839	14.998	3.62108	20.998	-7.30432	2.5678	13.3047	6.2035		2.47625	-0.087	1.8812	-1.05588	13.0872	1.23645	16.7363	4.05018	-9.8192	7.79902	-2.5488	-6.1872	-6.359	-0.5502	63.9888	-1.426	2.0894		23.8956	17.9507	-0.091	12.0035	18.3489	-8.71596		8.88707
10.2318	18.2138	86	0.21	7.524	-2.44682	3.68067	11.5322	-0.03004	10.0895	72.71	-6.62088	-4.2066		-4.948	5.9365	16.041	8.40898	15.5015	-3.21006	-0.6326	14.0926	7.52333		5.52275	-0.13975	-0.67028	-0.0860333	13.8049	2.78906	14.879	7.58617	-9.3604	5.12484	-3.42425	-5.52017	-5.5764	2.7516	90.2598	-2.2754	10.5232		2.86218	16.1526	1.685	13.9117	24.0384	-7.30168		12.7993
11.7041	21.5353	86	0.22	6.17253	2.6566	0.9714	10.3613	-0.59675	12.8802	84.3	-6.5906	-0.43925		-3.1798	10.2064	14.4945	15.7599	12.2459	-8.65194	5.513	14.218	5.1252		9.0148	0.103	-0.40085	5.07884	1.5929	1.86585	8.87818	11.2813	-9.2458	1.01904	-4.50476	-3.81067	-3.6755	7.1196	91.3758	-2.77667	21.211		-1.94853	15.4068	1.06975	17.6852	24.426	-4.30053		18.7033
13.4801	23.2644	86	0.23	16.5311	11.3101	2.4506	11.3909	-0.36774	12.3568	70.261	-5.7406	7.031		-1.2962	9.34725	14.4305	12.9446	22.6643	-9.28905	4.0482	15.0845	6.85233		11.7267	-0.301	0.0366	4.36773	1.4114	4.8174	7.60505	12.2824	-7.441	2.3182	8.33575	-3.6922	-0.4116	11.5744	102.256	-4.251	20.9614		-5.12758	14.2924	4.78875	20.0557	26.8139	-8.37292		22.7354
14.5046	20.7532	86	0.24	36.3899	12.234	5.89427	20.6527	3.26283	10.2352	66.5208	-3.88248	16.611		1.3372	14.0644	24.0545	11.1	26.7595	-6.91164	8.6258	4.1644	4.00633		17.6932	1.4062	1.07655	0.22384	3.25135	7.78163	7.9706	16.2088	-7.8562	2.0535	6.9216	14.7417	-1.695	9.6454	81.944	-4.0215	29.9658		-3.88342	14.7573	28.3672	30.032	20.1822	-7.92778		29.9637
16.3101	19.9591	86	0.25	57.4592	14.5263	5.56412	24.3162	4.33344	13.4713	84.9453	-2.7103	8.593		1.4898	19.6933	31.0017	15.2596	42.3308	-8.77454	8.7444	2.08663	0.5145		22.0607	3.2255	1.03392	6.24137	4.26734	6.32446	12.5919	13.4591	-7.7036	2.99492	3.54228	32.684	4.8626	17.5984	55.1842	0.7674	40.8464		-4.24564	21.0627	60.9186	25.0102	23.1522	-8.00697		33.0589
16.9264	20.5142	86	0.26	63.4152	12.1421	6.0427	26.5465	4.97608	13.0524	92.4608	-2.82377	13.111		1.5046	40.7294	23.6743	10.5876	16.8673	-9.70926	26.5844	1.5597	1.73		20.669	6.03	3.25972	16.1927	2.242	6.16432	21.1247	15.7871	-7.1208	5.8053	0.428725	36.2358	9.3635	13.2958	44.6538	0.474667	46.0132		-5.2929	23.8559	86.613	28.504	27.3692	-5.83466		25.9136
17.1632	18.7104	86	0.27	61.8624	10.192	2.03725	45.1752	6.19627	7.38854	80.355	-5.70778	24.3075		0.7246	48.5252	23.085	28.2711	7.45155	-7.40394	41.5692	1.66947	2.694		28.1224	5.21975	1.74802	24.8446	8.52133	4.3675	18.2419	16.985	7.7268	6.85554	6.66365	14.265	11.109	4.6146	32.3136	-2.0428	45.3572		-4.0403	20.0459	76.0078	19.8685	26.0684	-4.16476		26.1346
19.1874	20.6231	86	0.28	62.2126	10.2482	1.20097	62.681	3.28626	3.97547	65.0415	-6.1694	46.5468		5.454	52.8496	26.4387	33.9666	2.06386	-4.89242	47.3644	1.38828	21.2108		28.537	5.048	5.77948	29.779	23.3158	7.90107	12.421	14.8851	23.1	8.54512	2.93293	18.991	6.5	7.9412	35.0397	-1.868	55.4984		-9.02618	18.4426	80.5252	20.305	20.0695	-1.53407		25.4285
20.6228	22.6735	86	0.29	53.2983	9.57627	-0.7249	66.5196	1.96473	3.98536	73.8704	-6.48742	72.5883		13.2203	67.0165	29.679	25.5169	-4.83178	-5.24136	39.506	0.43734	31.32		31.2415	3.628	5.84212	41.9377	36.9468	14.1791	12.0497	12.3529	9.3038	8.47372	4.15457	46.6775	6.894	7.2232	28.9772	-4.7894	69.4522		-9.6392	21.027	74.4065	20.6848	26.3303	-4.70352		18.9911
23.294	23.8893	86	0.3	52.0485	12.8384	1.2334	76.6853	0.70948	3.291	70.4648	-2.44	73.347		13.4852	65.15	34.7677	23.815	-6.49088	-7.0983	41.4252	-0.137267	33.422		33.9446	5.49525	14.3402	45.9919	50.8875	17.0013	22.6368	19.6808	-0.4794	13.0769	0.6677	85.6462	6.546	20.2204	23.2834	-1.54417	59.1464		-7.68694	16.0071	69.2625	30.0838	32.2618	-5.92596		23.3204
24.6841	26.3469	86	0.31	33.4622	31.8528	1.93407	61.3973	1.54124	3.2857	55.6734	-2.66493	77.1858		13.0746	87.1425	30.9627	27.7184	-9.2823	-8.76386	53.8804	0.243583	47.7292		59.413	6.462	25.1252	38.6072	49.406	18.0431	24.7127	25.661	3.4642	5.18158	0.45695	111.201	3.6664	30.5246	22.0555	-1.5048	85.6528		-10.0006	15.3916	68.496	37.1233	29.9334	-5.57217		27.0683
26.8972	29.6902	86	0.32	23.665	42.7011	0.8745	51.6036	-0.785625	3.85142	43.143	-3.17533	84.4923		11.103	88.9108	34.6153	32.4058	-7.33136	-5.78325	139.175	-1.05488	43.053		71.6846	7.98925	31.5678	64.3117	41.7802	15.2097	22.9874	28.99	6.9314	2.8896	3.3611	83.2396	-0.5986	43.6738	20.92	-2.46317	121.047		-10.1075	11.6891	80.8792	33.6653	21.7752	-2.30312		18.8928
29.8128	33.863	86	0.33	27.0911	49.7535	3.35557	43.3939	-1.86372	4.3595	37.537	-3.1243	89.5332		10.181	89.0322	46.944	34.9627	-5.56553	-1.97946	157.536	-0.26305	85.2244		118.933	10.4572	33.0036	59.1767	47.2652	17.2406	21.5422	22.8723	21.105	6.43694	7.66512	61.3912	-1.513	59.207	17.5162	-3.4474	156.667		-7.62563	13.5621	75.6865	37.7477	32.014	-2.92342		18.6451
31.5746	33.0094	86	0.34	44.5888	30.0611	11.0882	48.3222	-2.39926	5.91677	29.429	-2.98133	91.951		30.3858	95.9087	63.1955	35.3499	-3.7141	12.5454	98.3046	6.45172	111.864		140.91	13.1038	29.848	63.5085	44.4149	19.6527	26.683	8.40365	79.135	9.49032	3.27878	66.7338	12.921	56.7576	23.2398	2.33333	125.76		-5.11166	16.1361	61.4503	35.511	27.2171	-6.2899		22.4537
32.3317	33.0577	86	0.35	61.128	19.5023	38.067	51.1227	-2.73155	5.73442	9.9586	-0.8824	99.8102		45.1714	141.046	83.0248	44.947	0.095475	16.389	54.6806	10.584	109.334		145.761	15.7673	37.3845	48.4478	38.8784	29.1075	33.1506	7.01313	70.3906	10.0775	4.82862	51.1675	17.1696	64.135	20.506	5.762	127.218		-1.7103	12.3172	60.1275	34.1292	24.4208	-7.10408		31.3121
31.3266	34.401	86	0.36	52.0008	16.3296	25.595	35.8518	-2.62502	4.16868	4.63675	-2.64503	93.021		41.6384	149.274	79.5273	20.2078	0.11064	12.8438	34.775	19.2452	81.7552		160.444	17.9047	27.7142	54.6706	41.9532	33.6097	33.0489	20.1882	33.975	12.4063	4.08573	42.8468	13.7438	68.657	8.5546	7.64583	147.135		-2.60254	18.4059	76.2863	30.1407	20.9033	-7.43166		49.8685
31.6776	34.3787	86	0.37	54.2984	22.4267	11.2074	16.263	-3.2968	3.15446	8.4958	3.70328	67.8053		43.9046	128.983	71.4035	14.2315	0.4067	15.2618	52.786	22.1384	83.5952		140.67	25.578	25.6176	45.2118	22.4021	38.5414	35.5427	10.4545	27.1328	17.3108	2.87985	30.926	3.9712	74.0028	8.12175	14.7934	156.871		-2.0738	19.9236	87.4567	32.1917	28.559	-8.39463		66.4079
31.1901	31.4143	86	0.38	63.8154	22.1209	22.5612	11.8764	-2.45024	4.4544	12.5258	4.0433	65.5946		44.343	100.902	84.366	13.5192	-4.34424	13.5154	60.7942	30.9799	96.5835		106.666	21.9304	30.3935	26.8301	13.3772	35.8694	42.9364	14.5101	10.046	21.7672	8.13065	33.1798	8.595	74.5788	6.5638	35.3312	132.828		0.69046	13.8495	73.468	37.8833	25.0726	-10.0325		64.098
30.3465	29.1013	86	0.39	54.6337	20.0668	22.3794	10.877	2.39804	8.28807	3.6536	4.3748	36.1597		51.2964	88.6688	68.3037	12.8246	-3.24718	9.52274	41.203	40.4445	78.8383		128.624	20.4915	22.1296	24.2355	16.4425	30.9306	55.9855	20.8915	17.7922	26.4246	1.25185	34.108	10.596	67.7616	5.6772	61.297	87.5532		-3.85193	14.9193	52.3328	39.9708	35.7428	-7.51134		59.7119
28.893	26.3818	86	0.4	43.1902	11.5708	27.3303	6.4603	13.0195	3.42096	1.6918	7.32468	28.8077		65.7242	50.5915	47.2257	15.7997	-4.88166	7.4428	25.5418	29.5243	72.6983		99.6595	24.2103	18.3333	26.9593	18.4316	28.4676	70.8997	14.2254	39.7712	30.106	0.865425	18.8438	13.6016	82.2312	8.254	58.8932	63.5996		-4.42452	16.9078	74.1008	40.7542	36.6286	-5.15295		33.4798
31.9523	30.8081	86	0.41	36.5123	5.7511	23.9832	4.06357	13.7231	3.8623	-0.0055	24.0226	44.0346		102.98	22.0024	36.4672	14.1492	-5.7439	4.94057	17.6956	19.0023	52.9688		102.059	23.0308	15.532	28.9395	23.0559	19.0226	70.9988	18.2021	56.7716	34.4616	-0.18515	24.9564	12.901	130.448	5.3896	123.694	87.0716		-4.03008	22.4659	69.2625	57.43	35.1879	2.4046		22.0979
30.4132	29.7538	86	0.42	37.4949	5.2291	14.9435	4.94285	9.86117	7.51678	-0.3202	32.5735	42.3192		107.76	10.2203	25.425	12.9151	-7.58636	7.0745	23.5802	15.1653	28.1668		46.9668	30.1845	12.4519	16.7382	19.3549	24.123	61.3092	27.6905	54.2982	22.5726	-7.22588	34.9882	29.949	112.674	4.315	146.815	85.0194		-5.63584	20.7359	50.427	59.0408	31.1475	7.00162		10.8234
28.4226	27.1894	86	0.43	46.3233	1.23427	9.8235	3.41963	13.5339	7.72747	-1.36225	21.8703	45.4895		90.473	4.8192	21.849	11.5646	-5.10515	23.8628	33.959	19.7449	9.668		18.2248	32.8264	7.27594	9.29265	19.305	28.8469	60.3814	33.1435	40.4284	13.2397	3.13625	31.3206	67.0298	98.4654	5.8922	109.778	69.3178		-6.7791	20.4057	33.1895	52.4352	22.3383	8.88672		13.7827
26.9808	25.8603	86	0.44	55.744	0.251833	7.12063	5.31977	16.3723	7.20384	2.224	22.9478	43.0892		76.7292	6.67225	17.761	9.85114	-4.72714	46.6281	26.6724	31.3788	7.2264		13.2032	39.2938	6.81397	6.67364	15.8567	25.0744	53.3043	35.7577	20.992	17.078	1.9658	15.3585	92.7482	50.982	2.40775	96.2556	65.573		-8.23902	25.4245	55.1922	39.063	17.8761	1.46822		29.0852
25.8482	27.7006	86	0.45	43.2836	1.7658	0.65565	6.85333	16.4006	6.78293	0.7626	17.7831	43.47		86.6712	4.7795	11.7055	4.50136	-4.64438	22.2451	4.607	27.3507	1.61067		8.29375	37.903	4.0915	3.90872	14.5417	22.4305	50.9975	33.5665	21.1504	13.1226	4.17915	1.553	73.0482	24.0896	0.8764	74.6463	95.6962		-8.32364	29.5496	80.9268	42.2585	16.5682	-7.6999		50.3297
24.7881	27.4858	86	0.46	26.7225	10.1813	0.2362	9.06743	22.2472	5.48094	0.86675	12.0188	52.1183		66.0495	-1.0642	10.2967	2.19092	-7.30748	7.0717	1.9416	20.8702	0.6995		4.991	49.637	4.5959	2.74425	13.7744	19.1179	46.4228	32.5941	25.3468	10.5516	4.17703	-3.15067	70.4183	20.9022	-1.6386	79.6784	112.454		-8.88568	32.0761	73.2297	68.468	18.9898	-5.47805		49.6923
24.68	27.9463	86	0.47	14.5067	11.4372	0.839475	7.66623	15.7687	9.60362	3.9266	11.1102	66.4865		52.133	-1.13125	13.3995	0.3694	-7.88838	-0.84798	3.7212	20.4732	1.19267		5.56625	53.2953	4.2896	2.36844	14.8963	18.9532	36.7405	26.8042	25.6634	10.6533	-0.3075	-3.93533	90.4008	12.033	-3.083	66.3897	112.949		-3.92676	37.6421	63.0385	78.1735	16.6396	-4.1725		37.5739
24.59	27.75	86	0.48	12.3995	12.2919	10.0694	8.83905	16.4923	10.7321	0.2886	12.764	55.267		44.8102	2.9672	11.8453	-1.69454	-7.4113	-3.6408	5.3254	14.9704	-1.0422		9.2455	62.0902	1.4266	2.53143	14.0794	15.2675	35.4099	36.7061	13.2306	9.59308	6.5682	-0.8646	83.3042	11.1494	-2.4708	40.7352	95.419		-0.12845	38.1672	42.3535	76.336	21.7055	-5.94752		43.6752
22.8895	27.2624	86	0.49	14.8966	15.9186	11.9184	10.4611	14.2272	9.53978	-0.7505	15.264	38.7568		40.2012	4.89875	17.4525	-0.48094	-8.22528	-6.49928	6.7326	16.0331	0.819667		11.9248	50.518	4.51818	4.62068	9.43608	9.9033	35.0457	22.2802	23.8314	16.2491	12.0128	-6.41083	70.194	6.8444	-2.47275	24.6882	73.018		0.53438	40.7333	17.9125	61.442	21.2305	-9.51232		41.4876
20.2978	24.4959	86	0.5	11.7891	15.544	5.27593	11.6049	19.8256	11.902	-0.6278	11.8056	26.8525		28.302	9.3054	17.7543	-0.010625	-7.9889	-9.0894	3.90725	9.80776	-3.41367		12.1442	106.483	4.37995	10.3324	11.5415	5.4749	29.9495	13.4087	24.1367	15.4764	15.4584	-7.2126	40.235	1.17917	0.0386	21.085	55.2717		-2.5669	37.4207	22.4798	57.2767	18.0772	-11.558		31.1981
17.9548	21.4077	86	0.51	15.211	17.0415	7.02487	9.8335	30.0705	9.8121	-0.5945	10.8439	23.526		22.7648	12.8897	7.50275	0.64316	-6.50645	-7.82564	2.6238	2.82503	-2.594		11.5544	115.931	1.41524	10.5351	15.333	5.37165	21.8735	12.7897	27.5768	17.5584	11.3335	-5.7635	33.5936	2.7162	0.32975	12.9693	48.2884		-2.5671	45.7398	12.4848	46.997	19.8376	-7.72685		20.1279
14.7374	17.178	86	0.52	12.5497	14.4775	6.4233	7.6745	18.6957	9.48236	-3.0996	5.27385	17.2152		17.1408	15.669	12.1073	-0.18488	-3.46996	-3.8809	1.3638	1.73395	-2.629		9.761	69.8278	1.38297	13.7005	11.4762	5.6272	27.9024	10.9447	23.0686	14.2365	8.9319	-10.1282	45.098	7.2334	-1.4908	13.7684	42.3428		-2.59055	35.9446	8.99325	39.675	19.9885	-3.46902		11.7584
15.2149	18.8784	86	0.53	10.823	10.4048	4.08507	5.74233	9.51473	8.39982	-2.0244	1.45347	28.9967		8.1244	19.0705	10.803	4.15666	-2.30198	-4.96192	1.037	-0.0689	-1.25167		8.711	74.8428	0.52692	27.4102	10.9091	7.22545	23.818	9.9355	17.6414	9.5135	7.749	-6.89017	52.9034	4.189	-2.56975	13.33	38.9188		-1.92082	38.6621	8.126	43.3555	21.3923	0.35878		6.16235
14.6309	18.3385	86	0.54	12.0971	17.7803	0.5464	7.14168	6.29776	8.75366	-3.95375	3.20172	43.516		7.94133	12.6894	6.61167	8.8834	-4.97626	-8.52884	2.2806	1.15873	-0.7175		7.3996	58.7323	-1.4129	31.7794	15.2733	11.5594	29.4358	9.77368	9.5624	2.40582	16.4013	-3.2035	27.6898	-1.0344	-4.0266	3.3092	28.1838		2.57945	39.4083	8.78325	48.7123	14.8666	2.25813		4.2587
14.4344	17.7098	86	0.55	13.3463	20.2718	1.73247	6.76267	7.34882	9.83922	-2.7244	1.67167	32.117		4.0076	11.696	10.6318	1.7665	-7.61455	-7.92956	0.4068	0.671433	0.712667		4.02775	47.9455	0.07664	35.5747	19.6025	9.30163	34.4334	3.6814	4.8132	1.4719	11.8258	-0.0414	11.3044	-1.8332	-1.598	0.922	21.23		-1.41318	33.9591	10.4042	50.893	10.9896	4.3172		5.00758
11.4128	13.8829	86	0.56	15.035	7.82037	-0.2006	7.16043	4.6996	9.24254	-4.9526	6.3093	14.6895		4.9172	14.3155	10.1133	0.43462	-2.18834	-8.89778	-1.1074	-0.844983	-3.74		3.6615	40.5285	3.10602	26.1684	21.9921	5.56147	30.4322	2.27422	1.1218	1.67325	3.521	-1.12733	2.7432	4.7414	1.77225	-0.912	15.842		-0.648	33.2907	4.4358	32.2697	9.93272	4.39336		4.81532
9.44646	13.3703	86	0.57	7.97382	-3.0601	1.7645	6.91627	4.89772	8.09073	-7.2785	7.34752	0.935		1.5192	9.1044	7.77267	1.55116	3.0607	-7.37504	0.7774	0.80198	-5.4755		2.9466	31.0756	1.48624	27.545	20.5038	3.18442	22.2587	1.21307	0.377	0.9589	2.01663	-8.6698	-5.4798	3.9242	-0.9856	4.34717	6.1488		0.18638	32.242	2.58975	20.5535	1.19892	1.91723		5.41372
8.32872	13.8233	86	0.58	4.50175	5.80703	2.70883	5.1136	2.54645	15.3792	-8.2752	9.36607	-1.054		1.1656	7.98475	5.24275	-0.1463	7.30588	-6.37878	-3.9226	-4.04042	-6.23167		3.19325	35.317	-0.3486	24.8988	11.6156	2.48602	12.7148	-2.2138	-0.544	-1.71216	11.6777	-8.86167	-6.08125	-0.1822	-1.231	0.7258	5.4996		15.1389	28.1936	1.8165	9.10225	0.80855	9.57718		5.65853
7.83997	15.0692	86	0.59	4.6601	7.66327	2.57307	5.67777	3.406	22.2959	-7.73975	9.5624	-3.4806		1.2584	7.3562	4.8275	-1.51006	12.9847	-2.9457	-3.8346	-6.25753	-5.7648		2.3688	29.5135	-1.31498	14.6603	9.28923	3.10702	8.90665	-3.7789	-0.6852	-1.94128	12.6739	-7.749	-4.8182	2.9868	-2.2528	-3.134	5.6126		14.5362	25.2156	2.86	9.51433	3.78785	7.05922		6.99342
7.32513	14.8778	86	0.6	4.22432	-1.27947	0.885633	4.3375	6.51548	20.3603	-7.3814	6.91798	-3.3075		3.3528	8.6115	5.8375	-1.38854	13.1893	-4.93912	-4.2478	-2.57018	-4.28967		4.3915	19.181	-0.4076	5.7712	0.89982	5.09152	8.30997	-4.73225	-2.5968	1.30072	13.8061	-4.24083	-3.315	6.166	-2.985	-2.1028	3.8782		13.8762	24.8268	3.1365	6.03125	7.29052	9.14343		4.753
7.82046	16.6674	86	0.61	5.8519	3.1885	3.1558	6.01123	5.61676	14.4531	-7.6376	6.59167	-4.974		3.2542	9.5888	5.90033	-4.19176	8.65502	-2.26178	-1.3986	-2.34172	-4.46983		8.9125	19.5267	0.27965	8.45742	-1.69653	4.2119	4.0139	-2.6008	-2.1804	3.27938	13.5862	-4.8076	-3.3954	-0.832	-4.7768	4.04783	4.4168		8.88428	22.8126	3.689	3.41525	11.3567	20.923		7.38268
6.60145	14.0585	86	0.62	3.8148	-0.56165	3.0309	3.40388	7.04508	17.4464	-9.55975	5.36153	-4.1918		0.946333	6.7805	4.425	-4.67644	1.158	-2.47716	-3.207	-2.65432	-3.85483		6.4258	18.2722	3.85998	6.67208	-3.42516	4.87135	3.0268	-0.903983	-3.994	0.306025	17.3973	-10.4623	-4.40425	-6.5974	-4.0422	-0.5535	5.63		7.76768	11.5046	4.808	4.61933	9.3046	10.338		10.485
5.74927	10.7819	86	0.63	18.6538	-1.01687	2.5391	1.71827	6.0148	18.031	-9.7636	7.89845	-3.27825		-0.2828	9.1904	5.519	-6.48586	-0.8341	-3.78838	0.0114	-2.8435	-3.4936		3.9755	14.066	6.12052	6.57105	-1.35182	3.71512	6.97455	-0.622783	2.9812	1.82486	14.1399	-11.359	-4.7694	-5.994	-3.82575	0.4672	4.0662		3.66677	19.5746	-1.0234	2.06525	8.20472	11.016		11.1985
5.42219	11.4362	86	0.64	20.3436	-3.36063	2.05243	4.4748	6.34148	22.9804	-4.63875	15.9636	-4.57275		-0.4208	6.37	5.632	-5.42768	3.58784	-4.97064	1.5978	-3.89884	-3.30983		-0.281	12.4805	3.82938	4.4949	-2.78115	3.2314	10.3193	1.68569	-5.1632	4.32852	12.8968	-9.5098	-5.1718	-1.7264	-3.991	-1.80917	2.017		-0.11646	7.88097	1.09125	0.634	0.30755	6.76318		9.28175
4.28683	10.8455	86	0.65	15.9817	-4.89843	2.86172	9.60343	2.3741	29.5722	-4.0938	13.5631	-5.2305		-4.9332	3.513	6.3595	-5.66822	3.79302	-4.41844	1.4866	-3.6634	-4.80667		-0.5014	10.3445	3.61567	9.52898	-4.62796	3.38787	12.142	-0.190583	-5.7756	0.337	7.72435	-9.91667	-3.8172	-3.1362	-3.71475	-0.269	3.1132		-3.98013	8.42075	3.16075	2.02175	2.51657	10.3693		1.37925
4.05275	10.0033	86	0.66	10.8665	-5.44883	4.31043	6.36727	4.65566	25.094	-0.5402	10.1131	-4.7032		-2.963	2.4935	4.8225	-5.82594	5.08006	-6.6473	4.3164	-1.33537	-5.67517		-1.453	7.76925	3.48786	6.75933	-4.54092	3.21587	14.4083	-1.89143	-9.8344	-0.41012	5.79155	-8.3434	-1.66825	-7.3578	-3.2648	1.01683	1.5664		2.8151	5.8144	3.3115	2.24825	1.71237	13.5835		4.24608
3.59228	10.177	86	0.67	13.3725	-3.29283	3.58772	1.0201	5.58718	28.7028	-4.5375	5.1154	-4.4255		-3.7762	3.2734	4.72975	-5.1235	-1.43015	-6.77734	4.8896	-2.95085	-6.4604		0.57975	5.3702	1.24325	5.25638	-3.9814	2.48745	14.988	-3.05228	-8.9702	0.74954	2.34308	-9.39733	-2.2328	-7.588	-3.4325	0.0462	1.0122		1.48755	6.64022	6.4165	5.41	-0.179	13.7717		11.1288
3.38591	10.3085	86	0.68	9.17258	-3.04363	4.79337	0.215075	1.60038	25.9134	-4.8418	-1.96818	-5.4505		-4.1816	3.824	5.704	-4.57578	2.45208	-5.79753	3.7724	-4.84638	-6.62017		2.521	4.11775	2.39808	6.61207	-3.65444	3.1232	7.81055	0.0619667	-8.7404	0.8594	4.24112	-10.744	-5.429	-7.4908	-2.6416	0.571833	-1.0324		-1.5022	-1.2911	5.9055	6.998	-0.647425	7.65276		13.4919
3.9106	10.6408	86	0.69	10.8311	-7.81023	3.5416	2.75937	0.6134	27.6529	-3.9246	-4.16707	-6.798		-3.4524	4.8315	4.4315	-4.37144	0.77235	-6.85614	2.6864	-4.64107	-4.53733		2.48075	3.60975	3.59265	5.17916	-1.2044	-0.942025	9.63097	3.11872	-8.3192	4.05446	6.42308	-8.15717	-5.2602	-5.4878	-3.494	-0.4832	-0.9972		0.4024	0.22125	5.4742	6.83067	-1.38333	3.74092		12.2939
3.70766	10.9047	86	0.7	6.08725	-4.94497	5.00993	2.80688	-1.81312	33.6638	-3.8865	-6.2131	-8.38825		-4.1822	0.9694	4.7295	-2.9712	1.85068	-7.1711	1.5488	-4.23628	-4.559		0.6712	2.423	9.8669	8.09062	0.31905	1.8513	6.44157	0.0518167	-8.1258	2.35438	2.17778	-8.3272	-4.135	-3.0774	-2.7846	-0.512	-1.4298		0.83486	0.42435	4.488	6.7995	-3.62588	6.23756		7.76262
3.8283	10.0729	86	0.71	7.17018	1.2154	3.60552	0.7491	-0.952025	35.9269	-4.9602	-6.34173	-8.0805		-3.30367	2.389	5.15567	-3.36284	1.65652	-5.37562	0.774	-6.12066	-3.74983		2.90475	1.6898	7.36735	4.77846	-2.0365	1.72406	11.4431	2.71818	-9.5076	0.18415	3.76598	-1.036	0.725	-2.4106	-1.0052	-2.8798	-1.2578		1.09527	2.9975	5.37825	9.132	-3.5376	8.11884		4.18794
3.58972	9.18647	86	0.72	1.682	4.8246	1.58543	2.5175	1.07294	36.7616	-4.78325	-6.30383	-7.5736		-1.3408	2.279	5.52	-2.93636	3.76956	-3.51084	0.7352	-5.3096	-3.40983		2.5215	0.741	5.17588	1.2234	-1.69232	-0.2817	7.94935	4.48027	-5.2792	2.33596	5.60177	-5.844	-1.1324	-1.6496	-1.066	0.0985	-2.081		1.72212	8.02192	8.94675	5.27233	-3.42358	12.4464		4.0121
3.59854	9.57165	86	0.73	4.3748	3.7027	-1.14305	5.0085	3.12778	25.2691	-3.8238	-5.36828	-5.6675		-0.2348	5.06325	5.03325	-3.8322	1.46107	0.68046	0.0874	-4.97743	-3.865		3.7118	-0.0065	3.09325	3.71578	0.6092	-2.39008	7.39522	1.20336	-7.7058	5.91688	8.42148	-7.7288	-3.673	-2.2342	-0.1286	-2.1358	-0.8388		-1.15568	9.10803	9.213	4.96275	-5.20338	4.0712		3.18305
3.48977	10.3795	86	0.74	-0.09155	1.64623	-3.54793	1.38688	1.97588	26.4649	-5.5006	-7.16535	-5.8635		-2.4814	5.342	8.52125	-1.1662	-1.7568	5.168	1.5182	-4.20975	-5.1216		2.76775	-0.6375	3.83458	7.26395	1.4986	-3.59315	8.69275	-0.660933	-10.601	6.95707	11.0058	1.14067	-4.60725	-5.3416	0.65975	0.439333	-0.707		-2.33282	4.67065	9.156	1.13133	-4.14043	7.30144		4.14078
2.56913	9.0362	86	0.75	-3.35385	1.35673	-3.30085	2.20423	-2.32972	17.9019	-2.82	-6.41407	-4.58925		-2.1446	3.17	10.746	-3.76938	0.875925	3.76468	0.5994	-2.66917	-6.1455		1.29775	0.335	5.10915	5.28402	-1.36708	-3.45418	4.16414	1.98788	-6.6692	4.5722	1.73985	-0.0966	-7.2218	-6.1984	0.672	0.9548	-1.6618		-0.34174	5.36264	6.34	1.6375	-4.47223	-1.81948		4.12183
2.72112	8.2878	86	0.76	-3.46315	5.46923	-3.36037	0.991567	-0.626225	9.22337	-1.3066	-4.6417	-7.6258		3.3898	0.5648	19.992	-2.40584	7.92388	-2.29658	-0.3372	-1.99212	-2.74783		3.616	4.2104	4.5741	6.61732	-2.1206	-4.2743	2.29855	3.55432	-11.1272	8.4424	-1.49765	-1.05483	-0.1436	-0.2136	0.15675	6.836	0.4834		-4.33515	4.89527	1.3575	2.99625	-5.00375	-6.25612		4.30923
3.02174	9.05356	86	0.77	-4.93997	5.7995	-2.82253	5.08815	0.10384	7.1142	1.395	-1.64763	-8.02425		2.0568	2.48625	21.994	-1.66084	10.3537	-5.24908	2.3598	-2.24977	-2.426		5.2345	5.31875	3.05568	5.32938	0.935	-4.72598	1.54192	0.370483	-11.5786	13.0048	2.03843	1.462	3.9456	1.045	0.4748	7.7704	2.8034		-3.4018	6.98112	0.6985	5.446	-5.98705	-5.12596		3.14235
2.77628	7.89696	86	0.78	-4.20617	12.109	-1.77963	6.52797	0.33055	9.55263	-1.28425	-1.0114	-7.2305		1.1122	2.1822	21.6253	-0.1003	9.82114	-6.32126	4.4516	-3.34492	-5.7942		3.8936	3.66975	1.8708	4.29506	4.266	-4.04923	3.31327	-3.95717	-7.796	11.5135	4.1801	-4.714	-1.6155	0.9148	2.36025	9.2965	2.8352		1.21655	10.2926	7.60575	6.30375	-5.43808	0.257817		4.49495
2.09116	6.8855	86	0.79	-3.91797	8.61797	-5.7049	2.10148	-1.38392	12.7752	-6.0888	-2.23898	-6.3636		-3.348	1.1475	21.7423	1.6496	4.18507	-11.1504	2.4676	-3.72496	-4.213		2.3355	6.30025	2.0293	1.65012	4.02058	-3.81184	1.10152	-2.55322	-3.483	9.13816	5.65803	-2.3105	-4.5862	-2.0752	2.8384	8.4166	2.4966		-1.4421	12.6794	6.9435	9.98733	-4.79738	-1.72568		3.5412
2.33035	7.09903	86	0.8	-5.8147	8.2136	-5.56687	3.28157	-1.79644	9.69337	-5.00175	-2.63435	-7.05025		-3.4162	-1.569	16.6743	-0.36026	6.26606	-11.6131	6.2154	-3.36148	-5.9515		-1.614	5.48175	2.05895	4.24978	5.50456	-2.11798	-0.35935	-2.91007	0.3878	9.72727	8.05445	-1.2204	-2.776	-0.2292	0.5874	7.25867	4.8442		-4.90867	13.7791	7.43225	8.36975	-3.51648	-1.21388		3.27303
2.17612	6.78743	86	0.81	-1.979	6.97487	-7.75608	4.07653	-1.01788	4.07458	-3.0454	-3.5689	-3.88775		-3.7408	-2.40675	9.799	-1.85024	1.1031	-10.2768	4.6216	-4.25745	-6.414		-1.836	6.166	3.21412	3.23318	7.4684	-2.5184	-0.1627	-5.44935	-1.5612	10.5063	14.6942	1.07717	1.7602	1.742	-1.363	7.9444	4.0346		-3.34332	18.0587	4.2814	7.1885	-2.6895	5.31607		7.47703
2.09691	5.84764	86	0.82	-4.8914	-0.710567	-7.30473	0.761733	-1.6173	1.5854	-4.1508	-3.2239	-3.6645		0.4934	1.299	7.20667	-1.7155	2.16726	-6.76858	7.9398	-4.83638	-5.70617		-1.218	8.05	2.61552	8.36702	7.09476	-2.59658	1.3114	-5.08096	-6.6886	9.50236	11.6078	3.8878	1.39975	2.1498	-0.5846	2.94	2.394		-5.86865	15.4122	1.95225	5.573	1.52592	4.37828		7.3123
1.68808	6.09681	86	0.83	-4.25157	-1.1131	-5.71688	1.19462	-3.78008	1.86904	-6.89175	-2.273	-4.1864		1.5592	0.6394	2.548	-2.21336	6.73345	-6.78676	8.18575	-5.36495	-4.5105		-1.55775	8.24875	1.87664	10.2016	6.68702	-0.147275	-0.2716	-2.55842	-11.0105	8.7268	11.0692	13.2678	0.1504	-0.303	-2.252	0.9168	2.8936		-8.2025	15.4004	-0.97025	5.753	-2.9477	-0.40692		7.43138
1.70579	6.07966	86	0.84	-6.24932	1.8399	-5.7377	-3.01047	-2.89166	3.85035	-5.7694	-2.65063	-6.27625		1.537	-1.63175	1.6445	-1.71328	5.68024	-9.01518	4.8136	-6.01708	-3.229		-2.2412	3.89675	2.88845	4.37052	3.82878	3.1417	1.0754	-0.895817	-4.0524	5.44208	17.2132	12.5722	0.585	-4.3828	-0.4924	0.796333	2.0428		-3.22947	22.5326	1.5205	5.1175	-5.34548	-5.39472		7.55572
2.33098	6.71585	86	0.85	-5.71555	-5.4585	-5.9107	-2.27958	-3.28708	1.6983	-3.2666	-1.61667	-5.118		-4.1386	-0.842	4.093	-0.79104	4.65985	-8.78918	3.8888	-5.00792	-2.1246		-1.56775	4.14225	6.69352	3.33555	4.61344	9.02927	4.2473	-1.87435	-3.9568	7.33204	14.622	7.601	-1.7822	1.0808	0.3005	2.3874	0.7842		-4.5664	26.6748	-0.86725	3.67833	-5.05428	-7.3136		7.7167
2.73511	7.50139	86	0.86	-6.43152	-0.1109	-5.7589	-1.56823	-0.994625	1.518	-1.292	-0.1231	-3.0538		-4.0188	-1.8305	2.05867	-1.30172	3.85702	-8.44712	5.9132	-5.4873	-3.56783		-0.9164	1.6016	7.04455	4.27388	2.20906	11.8127	2.87787	-1.41643	-6.1344	10.1035	14.6735	4.7024	-5.3315	0.531	2.8306	6.5545	2.626		-1.41305	38.041	4.18325	3.7135	-3.41255	-7.08102		8.17558
2.07175	6.956	86	0.87	-8.78918	-3.81633	-3.02268	1.38435	0.5969	0.25128	0.585	0.818575	-2.20925		1.58117	-5.0276	2.59375	-2.0369	5.6416	-10.1927	7.221	-7.54275	-4.0315		1.17025	0.50575	3.97606	2.10698	3.08348	6.7113	3.59607	0.0629667	-12.9982	9.59252	14.9658	1.03883	-5.645	-2.6614	2.366	1.4895	2.3242		-4.48774	29.7663	4.745	-0.399	-3.03063	-7.59235		3.62213
1.90672	7.00209	86	0.88	-8.07832	-1.51207	-3.0417	-3.45363	0.1413	3.27798	2.44	2.7611	-6.07075		4.7664	-4.94425	8.02375	-1.74476	-0.1513	-11.6778	5.927	-5.39577	-4.08867		0.80825	-0.85575	1.15075	1.2497	-1.16828	7.70357	7.8471	-1.45583	-11.7992	7.78378	17.8216	0.506333	-0.7254	-2.3624	2.0148	-1.477	2.7174		-3.56038	24.2182	3.6676	-2.041	-1.24195	-3.12228		3.42692
1.93941	7.62328	86	0.89	-6.21503	-0.153367	-0.4228	-1.88445	-0.34568	3.74342	1.8698	7.3593	-7.25875		0.8926	-5.4056	6.55333	-0.2766	-2.54765	-12.0796	4.6784	-5.52453	-3.4066		0.146	0.1	0.66124	3.6816	-3.77104	1.1277	8.85815	-3.58623	-12.7686	5.72832	25.8189	-3.1708	9.5438	-2.9948	0.7288	-2.665	2.5682		-0.49728	25.4313	2.786	-3.2755	2.3827	-6.79704		3.07585
1.90796	7.50522	86	0.9	-9.67568	1.721	-0.539167	0.8128	1.90666	1.59176	0.0704	6.0112	-7.1966		-2.4976	-7.91425	6.703	2.16425	-0.7015	-10.747	3.4014	-6.19168	-4.20917		0.7075	0.1896	3.61075	8.00582	-1.67202	0.53415	5.74702	-2.26347	-14.2198	2.25004	27.9574	1.9625	9.481	0.1274	-0.60125	-2.0956	3.3804		-0.82125	16.6992	-0.327	-0.654333	3.5129	-4.2734		1.34285
2.32755	7.39524	86	0.91	-9.01333	1.73477	1.5388	2.13095	3.2417	2.06737	0.70275	3.21315	-5.04475		-2.6538	-7.905	6.9385	4.94004	-5.6015	-10.1071	5.192	-5.83142	-4.23733		4.4585	-0.06925	9.83604	5.92542	2.16618	1.0885	7.70308	0.7662	-13.3754	-0.81736	27.5481	3.188	2.2456	2.631	-2.895	2.81517	6.8118		-0.9901	16.8224	2.0185	-1.33375	-3.52778	-7.94282		2.72935
2.49447	7.4639	86	0.92	-4.4237	-2.4569	1.2016	0.372633	2.72058	2.76534	0.3688	2.20443	-5.37825		0.1298	-8.32275	7.94875	3.05158	-4.31664	-8.86312	6.5984	-5.00812	-3.49667		5.1616	0.09325	11.0301	0.219967	4.24028	0.366275	14.8658	1.24738	-14.8276	-1.99503	23.324	9.95617	-0.5774	-0.6204	-0.5005	3.9524	2.2586		0.76904	17.9509	1.29825	-1.23633	-2.57125	-7.17168		3.3172
2.68571	7.11192	86	0.93	-2.22015	0.1636	-3.64475	-1.20337	7.14982	5.53665	-1.334	2.27515	-7.8376		4.0026	-7.6438	7.89533	-0.0348	0.889775	-6.09148	6.8504	-4.82934	-5.6838		0.66425	-0.04525	11.9535	-4.36752	1.60347	1.66664	18.4762	0.559533	-15.2568	-0.82814	16.378	5.166	3.24	0.556	1.1478	2.4025	1.1812		4.7649	19.6397	1.45875	-0.4975	4.1401	-4.30235		2.58583
2.46515	6.19237	86	0.94	-5.43353	4.0111	-2.40663	1.13107	0.789075	4.39528	-3.6544	4.59267	-6.89975		3.4876	-6.71275	7.743	3.32368	6.85328	-9.25822	3.37	-2.4338	-5.28733		2.54925	0.91225	7.00728	-2.56487	-1.4684	4.3603	13.823	5.9614	-15.8324	-2.87384	11.2826	0.6115	6.69625	6.8602	4.54375	-0.8636	0.2222		5.73256	14.3771	0.9854	-2.61425	9.66013	-3.31334		3.3025
2.43717	5.93631	86	0.95	-5.248	2.6971	-2.64065	2.8044	-0.57678	3.44982	-0.7214	4.8172	-5.20525		1.9412	-8.79775	7.395	4.75296	5.51712	-11.9345	2.6834	-3.76492	-2.7525		1.767	0.3126	0.524075	2.34853	-2.17706	8.35745	8.68427	2.90187	-16.027	-4.15733	8.37092	14.1668	4.538	5.1448	5.371	1.16483	-1.1536		5.49737	9.87692	-0.59825	-3.259	10.306	-4.24946		4.87373
2.16272	5.90094	86	0.96	-7.22733	-3.2775	-3.79583	2.52863	-0.258625	1.74358	-0.7235	3.51702	-1.48675		8.249	-8.5042	6.79433	10.7138	-1.4379	-11.6646	1.637	-2.77395	-3.3782		1.95025	0.597	3.50848	0.83934	-2.1114	7.69188	7.3046	4.23518	-14.9294	-3.07974	2.39748	7.20183	1.7208	7.3692	1.4356	0.4972	-0.1196		4.67502	5.438	4.933	-2.81075	15.3009	-5.60067		4.09753
1.6271	5.95713	86	0.97	-5.30498	-4.22737	-4.11547	3.60793	3.31314	1.74708	0.3568	5.19137	-3.7432		3.0026	-9.85475	3.50475	5.70376	-6.88073	-10.7093	4.7728	-3.70378	-3.41083		4.875	3.3265	7.22167	-2.35923	-2.02068	6.1371	8.3329	4.59402	-14.4228	-1.91824	1.31785	2.79667	-3.6654	5.1694	1.35275	5.43133	1.7406		5.09507	3.74152	7.03075	-1.894	23.0724	-6.26266		6.14863
1.37537	6.08233	86	0.98	-7.0637	-6.92973	-3.42473	8.31443	2.66732	0.04928	-2.4888	5.57323	-5.19475		5.041	-10.0046	1.45825	1.29292	-5.68338	-11.1351	9.572	-3.8047	-3.75633		6.061	0.44925	7.09624	-2.91006	-2.19686	8.0812	7.97887	-0.641017	-14.122	0.404	2.06125	-1.2176	-5.97925	4.9394	1.7804	1.2836	0.565		1.3344	7.9239	7.35675	4.64525	27.9742	-1.7784		6.70435
2.07445	6.60384	86	0.99	-8.71007	-3.3408	-0.587925	10.8169	4.25183	1.34417	-1.683	1.58985	-3.94125		7.6716	-10.4298	7.9985	-0.47036	-2.0494	-11.989	7.9726	-0.649083	-4.28383		3.3855	1.508	10.5616	-2.84607	0.07545	4.5836	1.9351	0.18615	-12.2876	1.22316	3.15108	-3.19617	-3.786	3.1996	0.298	-3.25633	0.7092		5.91097	10.9053	5.83325	4.51325	27.9493	-5.68932		5.33685
2.29571	7.29026	86	1	-6.99465	0.57215	-0.3044	11.238	6.1671	0.151233	1.06833	5.4974	-3.079		5.72833	-8.166	10.7615	1.62963	-2.89443	-12.4302	7.57533	-0.916767	-2.50133		2.99933	3.23067	11.0408	-2.9952	1.41147	0.528867	-1.62637	1.00338	-14.7903	-0.0537333	7.49983	0.413667	1.98067	0.575333	1.057	-2.947	3.31833		4.95797	17.2349	1.46967	1.746	22.5996	-6.64953		3.47617
			MAX	63.8154	49.7535	38.067	76.6853	30.0705	36.7616	110.465	32.5735	99.8102		107.76	149.274	84.366	44.947	42.3308	46.6281	157.536	40.4445	111.864		160.444	115.931	37.3845	64.3117	50.8875	38.5414	70.9988	36.7061	79.135	34.4616	27.9574	111.201	92.7482	130.448	102.256	146.815	156.871		76.2446	45.7398	87.4567	78.1735	36.6286	20.923		66.4079
			MAX - background	45.2834	29.7535	25.504	69.2553	20.2175	30.2856	95.1658	19.0355	87.1953		94.8882	134.227	77.605	35.668	21.9808	29.1131	146.884	29.4806	102.017		153.431	111.083	30.1705	52.3207	41.9065	29.1294	60.2758	26.4651	57.279	24.3826	12.1364	92.438	76.3832	113.591	94.076	135.604	150.831		61.3086	33.0128	80.0078	70.0295	24.5656	4.69302		59.3289
			SUM	1373	470.231	288.495	1231.65	453.452	960.706	1397.63	270.529	1299.8		1146.46	1543.82	1760.68	501.595	172.425	-392.578	1331.26	300	830.139		1785.62	1408.57	644.893	1049.46	751.031	755.8	1566.48	731.83	172.517	726.372	657.703	767.572	1031.61	1046.92	1388.16	1005.33	2781.04		601.194	1801.27	1990.22	1699.01	1216.32	-151.189		1360.43
[truncated: 44 more columns]

## Sheet: Fig4h-j_RFP-
			Litter #	E17.5 (102413)	E17.5 (102413)	E17.5 (102413)	E17.5 (102413)	E17.5 (102413)	E17.5 (102413)	E17.5 (102413)		E17.5 (102413)	E17.5 (102413)	E17.5 (102413)	E17.5 (102413)	E17.5 (102413)	E17.5 (102413)	E17.5 (102413)	E17.5 (102413)	E17.5 (102413)	E17.5 (102413)		E17.5 (20509)	E17.5 (20509)	E17.5 (20509)	E17.5 (20509)	Or pos?	E17.5 (20509)	E17.5 (20509)	E17.5 (20509)	E17.5 (20509)	E17.5 (20509)	E17.5 (20509)		Out?	E17.5 (20509)	E17.5 (20509)	E17.5 (20509)	E17.5 (20509)	E17.5 (20509)	E17.5 (20509)	E17.5 (20509)	E17.5 (20509)		Not sure about this embryo	E17.5 (20509)	E17.5 (20509)	E17.5 (20509)	E17.5 (20509)
			Embryo #	R1_Pos	R1_Pos	R1_Pos	R1_Pos	R1_Pos	R1_Pos	R1_Pos		R2_Pos	R2_Pos	R2_Pos	R2_Pos	R2_Pos	R2_Pos	R2_Pos	R2_Pos	R2_Pos	R2_Pos		e1_Pos	e1_Pos	e1_Pos	e1_Pos	e1_Pos	e1_Pos	e1_Pos	e1_Pos	e1_Pos	e1_Pos	e1_Pos		e3_Pos	e3_Pos	e3_Pos	e3_Pos	e3_Pos	e3_Pos	e3_Pos	e3_Pos	e3_Pos		e2_Pos	e2_Pos	e2_Pos	e2_Pos	e2_Pos
			Image #	Series009_1	Series009_2	Series011	Series020	Series024_1	Series024_2	Series025		Series044	Series046	Series050	Series051	Series056	Series057	Series061	Series065	Series070	Series071		Series002	Series003	Series005	Series007	Series008	Series010	Series011	Series012	Series014	Series015	Series018		Series020	Series024	Series032	Series034	Series037	Series041	Series043	Series047	Series048		Series093	Series097	Series100	Series102	Series103
			RFP	Neg	Neg	Neg	Neg	Neg	Neg	Neg		Neg	Neg	Neg	Neg	Neg	Neg	Neg	Neg	Neg	Neg		Neg	Neg	Neg	Neg	Neg	Neg	Neg	Neg	Neg	Neg	Neg		Neg	Neg	Neg	Neg	Neg	Neg	Neg	Neg	Neg		Neg	Neg	Neg	Neg	Neg
				Background	Background	Background	Background	Background	Background	Background		Background	Background	Background	Background	Background	Background	Background	Background	Background	Background		Background	Background	Background	Background	Background	Background	Background	Background	Background	Background	Background		Background	Background	Background	Background	Background	Background	Background	Background	Background		Background	Background	Background	Background	Background
		Background		8.384	10.923	16.703	14.502	20.559	16.74	10.321		10.022	8.112	6.724	14.424	7.451	6.39	21.141	14.256	10.803	20.39		5.046	5.526	5.21	6.633	5.735	7.678	6.989	4.309	5.541	5.205	5.612		31.224	8.751	17.243	18.635	15.145	13.278	16.888	10.305	14.81		8.217	14.71	16.932	21.977	14.829
MEAN	SDEV	N	Round prop:	Means:	Means:	Means:	Means:	Means:	Means:	Means:		Means:	Means:	Means:	Means:	Means:	Means:	Means:	Means:	Means:	Means:		Means:	Means:	Means:	Means:	Means:	Means:	Means:	Means:	Means:	Means:	Means:		Means:	Means:	Means:	Means:	Means:	Means:	Means:	Means:	Means:		Means:	Means:	Means:	Means:	Means:
			0									16.3448
			0.01									30.2128
			0.02									36.618
			0.03									41.3954			19.8338
			0.04									31.0701			51.8672									13.7689
			0.05									36.0201			67.7083	18.0053								24.9586
			0.06									31.3279			64.1225	26.763								27.1505
			0.07									29.1357			45.4365	34.683								29.0608
			0.08									28.9139			61.3425	26.3509								29.6513
			0.09									25.3701			87.9663	30.37								25.5867
			0.1									25.2836			76.098	29.4389								28.3087
			0.11												46.8802	25.9199								35.1728
			0.12												43.4232	17.4734								20.6833
			0.13												44.1315	15.6613								9.67902
			0.14												35.0083	18.7677
			0.15												22.4862	25.6991
			0.16												21.578	19.0735
			0.17												15.7045																																		4.76052
			0.18																																												13.1698		20.4025
			0.19																																												20.8404		28.1761
			0.2																	7.96168																											28.4924		50.1486
			0.21																	24.2815																											36.7377		56.6607
			0.22																	24.8768																											33.4357		39.5655
			0.23																	54.9764																											19.1524		28.2008
			0.24		19.2023															57.1035																											20.5442		23.8876
			0.25		26.0264														15.1143	37.4741																											22.0907		13.3338
			0.26		27.1116														23.4578	28.9539								13.8807			15.4912																31.1636
			0.27		33.5602								11.4883						25.7	31.3576								27.825			31.2711											14.758					39.2139
			0.28		35.2616								26.905						29.253	73.6539								42.4228			30.5085		16.0214									25.466					22.4995	10.4525
			0.29		35.772								43.4673						33.7222	53.3274								42.7958			18.8604		22.5358									27.3675					27.0139	21.1155
			0.3		33.6786	9.79875							48.5067						24.2549	24.8436								36.8677			28.7937		19.5912									34.3142					36.7661	33.236
			0.31		30.3083	26.7838		14.1789					59.0037						29.7379	14.4948								44.5642			17.1353		28.63									39.6676					43.0125	41.3506
			0.32		25.1173	48.8324	19.7356	22.4506					52.3887						28.1299									57.825				13.997	47.1312				16.7611			24.6776		32.6662					56.8425	56.4915
			0.33	16.2687	27.3838	53.508	19.1724	36.2828					48.6027						17.3074									114.414				25.8552	57.7342				33.1705			31.2628		16.9121					56.0763	46.3492
			0.34	22.6709	31.5529	51.4998	20.7518	38.3993					80.9947	18.1259														129.683				31.5794	56.5473				48.0541			22.9781		18.8858				5.43694	25.7657	42.724
			0.35	22.5926	23.8036	34.3184	27.8693	36.618	15.4423				87.6007	21.6762													17.2568	72.152				36.3309	66.1128				47.522			13.4896		24.6449				35.8502	7.3836	44.086
			0.36	23.1376	21.8973	19.86	22.3155	44.2564	23.271				73.0183	27.9275													24.2341	47.4617				33.8604	83.0978				42.2254			31.0903		32.2865	13.6431			37.0921	14.9067	54.8805
			0.37	20.095	33.0562	26.3628	21.319	41.3101	24.6108				61.1837	26.3638													34.9359	31.9312				34.2146	89.8314				64.9363			68.0063		34.4731	21.4257			27.9697	23.2777	53.355
			0.38	27.9929	58.8743	64.803	19.8146	36.9056	35.1837				60.5615	23.6731													38.7959	22.4095				40.0423	85.635				59.203			70.0085		45.6524	23.352			17.2474	19.0139	55.014
			0.39	33.2711	61.7878	95.7772	22.1065	30.2499	34.1205				47.0283	25.8057													35.6706	20.9473				36.3844	61.6737				51.532	12.6846	14.1072	60.499		25.1073	28.8779			28.2288	20.3267	94.3302
			0.4	35.5794	52.9293	95.0178	21.0965	26.7533	18.2				28.5192	20.1191													34.9831	9.3944				38.8821	55.4102				31.1012	62.8435	21.5513	63.9214		12.7927	27.1042			33.8353	22.1816	130.418
			0.41	32.6325	59.7328	32.583	26.8549	19.2099					32.2737	18.2743									13.973				40.9747	14.141				35.0895	53.0872				25.8375	96.9628	29.7323	49.6727		11.6169	20.7982			41.8436	25.9561	160.526
			0.42	44.3874	56.2266	49.5842	35.6335	8.16142					28.819	19.7377									22.4886				42.7611	23.5707				25.2023	52.7468				19.0138	94.497	27.9462	41.2442		12.0205	10.2508			43.1103	27.2469	169.22
			0.43	46.4673	42.6337	55.5384	45.3442			19.7468			15.0517	17.9942									28.8229		17.7484		32.2377	33.8873				19.5072	42.585					71.262	32.4215	61.0983		14.3894	12.8836			17.6994	20.7832	120.857
			0.44	46.0824	43.9881	52.1696	54.94			29.1278			22.843	21.658									31.5511		23.7772		20.2784	31.0153				18.5014	24.6654					67.1535	39.052	66.6888		11.9061	22.8571				32.2779	98.8038
			0.45	45.5766	58.7859	20.5238	50.26			35.515			38.512	21.4373									22.3432		29.9075		14.602	22.8005				21.9716	19.9838			16.6261		49.6622	35.9227	64.1352		22.4429	32.0221				41.4215	110.204
			0.46	42.9631	60.1362	8.586	48.1091			45.6784			27.8475	25.1701									18.5294		21.9371			18.8975				25.7358				22.5174		31.9742	27.4719	54.9011		25.605	34.9874				22.4913	128.541
			0.47	50.8884	73.3265		34.3012			62.003			23.6183	24.9309											10.5609							33.9308				23.2832		23.8078	25.3987	40.1662		25.4339	41.3506				9.39786	147.544
			0.48	51.0675	72.4047		20.1604			96.4343			12.2725	35.0701																		39.6652				23.9974		12.6215	28.6441	13.7247		32.8705	50.5025					165.431
			0.49	50.744	68.1758		13.004			117.188				39.6382																		40.5143				13.175			36.0384			46.0715	32.5436					129.549
			0.5	41.1223	57.7378					112.468				43.3088																		24.6366				13.7083			35.4657			42.5801	16.4003					121.303
			0.51	38.9618	29.2428					61.5886				50.1585																		24.5616				18.8208			29.5843			31.2115	14.7481					109.475
			0.52	36.4203	27.6448					73.4005				56.2727																		25.406				19.1524			17.9331			25.182	23.121					90.445
			0.53	29.8714	19.6871					75.4006				60.4208																		27.0491				15.2543						21.6766	27.4817					62.45
			0.54	28.7225	18.1029					43.4798				50.3301																		26.1312				20.4283						20.6446	24.2183					26.4762
			0.55	25.9732	24.0907					28.9472				34.5426																		19.2249				26.3072						21.5265	40.0136					6.67425
			0.56	26.1416	31.0116					22.1844				23.141																						41.2257						23.7346	45.0509
			0.57	22.2927	30.242					33.7518				16.487																						54.6971						16.6485	42.5642
			0.58	20.2174	31.6577					43.4303																										44.5781							35.4782
			0.59		36.0354					28.766																										24.8331							4.54303
			0.6		50.7083					12.9848																										6.78295
			0.61		55.6893
			0.62		50.7001
			0.63		32.5616
			0.64
			0.65
			0.66
			0.67
			0.68
			0.69
			0.7
			0.71
			0.72
			0.73
			0.74
			0.75
			0.76
			0.77
			0.78
			0.79
			0.8
			0.81
			0.82
			0.83
			0.84
			0.85
			0.86
			0.87
			0.88
			0.89
			0.9
			0.91
			0.92
			0.93
			0.94
			0.95
			0.96
			0.97
			0.98
			0.99
			1
				863.897	1581.96	736.355	506.419	343.606	134.007	925.73		310.878	918.626	704.957	685.818	269.667			210.467	422.077			121.457	232.297	89.7765		320.801	842.498			125.747	681.663	865.018			373.683	421.469	510.816	385.249	758.364		774.852	637.125
				363.897	801.964	416.355	166.419	123.606	34.007	585.73		110.878	498.626	244.957	405.818	49.6667			50.4665	202.077			21.4569	52.2966	9.77647		120.801	442.498			25.747	221.663	525.018			73.6828	221.469	330.816	125.249	438.364		174.852	177.125
[truncated: 14 more columns]

## Sheet: Fig4h-j_RFP+
30			Litter #	E17.5 (102413)	E17.5 (102413)	E17.5 (102413)	E17.5 (102413)	E17.5 (102413)	E17.5 (102413)	E17.5 (102413)	E17.5 (102413)	E17.5 (102413)		E17.5 (102413)	E17.5 (102413)	E17.5 (102413)	E17.5 (102413)	E17.5 (102413)	E17.5 (102413)	E17.5 (102413)	E17.5 (102413)	E17.5 (102413)		E17.5 (102413)	E17.5 (102413)	E17.5 (102413)	E17.5 (102413)	E17.5 (102413)	E17.5 (102413)	E17.5 (102413)	E17.5 (102413)	E17.5 (102413)	E17.5 (102413)	E17.5 (102413)	E17.5 (102413)	E17.5 (102413)	E17.5 (102413)	E17.5 (102413)	E17.5 (102413)	E17.5 (102413)		E17.5 (102413)	E17.5 (102413)	E17.5 (102413)	E17.5 (102413)	E17.5 (102413)	E17.5 (102413)		E17.5 (20509)
20			Embryo #	R1_Pos	R1_Pos	R1_Pos	R1_Pos	R1_Pos	R1_Pos	R1_Pos	R1_Pos	R1_Pos		R2_Pos	R2_Pos	R2_Pos	R2_Pos	R2_Pos	R2_Pos	R2_Pos	R2_Pos	R2_Pos		R4_Pos	R4_Pos	R4_Pos	R4_Pos	R4_Pos	R4_Pos	R4_Pos	R4_Pos	R4_Pos	R4_Pos	R4_Pos	R4_Pos	R4_Pos	R4_Pos	R4_Pos	R4_Pos	R4_Pos		R2_Pos	R2_Pos	R2_Pos	R2_Pos	R2_Pos	R2_Pos		e1_Pos
10			Image #	Series001	Series004	Series006	Series007	Series012	Series014	Series018	Series019	Series023		Series042	Series043	Series052	Series059	Series062	Series063	Series064	Series067	Series068		Series001_1	Series001_2	Series002	Series004	Series006	Series007	Series010	Series017	Series018	Series029	Series033_Pos	Series038	Series039	Series041_2	Series045	Series046	Series047		Series063	Series065	Series066	Series070	Series071	Series072		Series004
			RFP	Pos	Pos	Pos	Pos	Pos	Pos	Pos	Pos	Pos		Pos	Pos	Pos	Pos	Pos	Pos	Pos	Pos	Pos		Pos	Pos	Pos	Pos	Pos	Pos	Pos	Pos	Pos	Pos	Pos	Pos	Pos	Pos	Pos	Pos	Pos		Pos	Pos	Pos	Pos	Pos	Pos		Pos
				Background	Background	Background	Background	Background	Background	Background	Background	Background		Background	Background	Background	Background	Background	Background	Background	Background	Background		Background	Background	Background	Background	Background	Background	Background	Background	Background	Background	Background	Background	Background	Background	Background	Background	Background		Background	Background	Background	Background	Background	Background		Background
		Background		18.532	20	12.563	7.43	9.853	6.476	15.299	13.538	12.615		12.872	15.047	6.761	9.279	20.35	17.515	10.652	10.964	9.847		7.013	4.848	7.214	11.991	8.981	9.412	10.723	10.241	21.856	10.079	15.821	18.763	16.365	16.857	8.18	11.211	6.04		14.936	12.727	7.449	8.144	12.063	16.23		7.079
MEAN	SDEV	N	Round prop:	Means:	Means:	Means:	Means:	Means:	Means:	Means:	Means:	Means:		Means:	Means:	Means:	Means:	Means:	Means:	Means:	Means:	Means:		Means:	Means:	Means:	Means:	Means:	Means:	Means:	Means:	Means:	Means:	Means:	Means:	Means:	Means:	Means:	Means:	Means:		Means:	Means:	Means:	Means:	Means:	Means:		Means:
			0
			0.01
			0.02																																							12.358
			0.03																																							22.7313
			0.04																																							22.5923
			0.05																																							15.0838
			0.06																																							22.8501
			0.07																																							25.008
			0.08																																							27.7294
			0.09																																							24.2375
			0.1																																							27.9348
			0.11																																			17.4912				35.734
			0.12																																			32.6418				33.8646
			0.13							17.0614																												41.4917				39.2642
			0.14							20.3613																												63.7598				39.9174
			0.15							27.8636																												76.6063				58.9041
			0.16				17.7095			54.1636																												89.6392				76.2446
			0.17				30.6269			79.741																												70.9477				70.5437
			0.18				27.6504			93.8006																												67.6594				58.7201
			0.19				20.0638			110.465																												61.618				40.5475
			0.2				10.9284			85.2327																												63.9888				23.8956				18.3489
			0.21				11.5322			72.71																												90.2598		10.5232						24.0384
			0.22				10.3613			84.3								12.2459																				91.3758		21.211					17.6852	24.426			18.7033
			0.23	16.5311			11.3909			70.261						14.4305		22.6643																				102.256		20.9614				4.78875	20.0557	26.8139			22.7354
			0.24	36.3899			20.6527			66.5208						24.0545		26.7595						17.6932											14.7417			81.944		29.9658				28.3672	30.032	20.1822			29.9637
			0.25	57.4592			24.3162			84.9453					19.6933	31.0017		42.3308		8.7444				22.0607											32.684			55.1842		40.8464				60.9186	25.0102	23.1522			33.0589
			0.26	63.4152			26.5465			92.4608		13.111			40.7294	23.6743	10.5876	16.8673		26.5844				20.669			16.1927								36.2358			44.6538		46.0132				86.613	28.504	27.3692			25.9136
			0.27	61.8624			45.1752			80.355		24.3075			48.5252	23.085	28.2711			41.5692		2.694		28.1224			24.8446								14.265			32.3136		45.3572				76.0078	19.8685	26.0684			26.1346
			0.28	62.2126			62.681			65.0415		46.5468			52.8496	26.4387	33.9666			47.3644		21.2108		28.537			29.779	23.3158							18.991			35.0397		55.4984				80.5252	20.305	20.0695			25.4285
			0.29	53.2983			66.5196			73.8704		72.5883			67.0165	29.679	25.5169			39.506		31.32		31.2415			41.9377	36.9468		12.0497					46.6775		7.2232	28.9772		69.4522				74.4065	20.6848	26.3303			18.9911
			0.3	52.0485	12.8384		76.6853			70.4648		73.347			65.15	34.7677	23.815			41.4252		33.422		33.9446		14.3402	45.9919	50.8875		22.6368	19.6808				85.6462		20.2204	23.2834		59.1464				69.2625	30.0838	32.2618			23.3204
			0.31	33.4622	31.8528		61.3973			55.6734		77.1858			87.1425	30.9627	27.7184			53.8804		47.7292		59.413		25.1252	38.6072	49.406		24.7127	25.661				111.201		30.5246	22.0555		85.6528				68.496	37.1233	29.9334			27.0683
			0.32	23.665	42.7011		51.6036			43.143		84.4923			88.9108	34.6153	32.4058			139.175		43.053		71.6846		31.5678	64.3117	41.7802		22.9874	28.99	6.9314			83.2396		43.6738	20.92		121.047				80.8792	33.6653	21.7752			18.8928
			0.33	27.0911	49.7535		43.3939			37.537		89.5332		10.181	89.0322	46.944	34.9627			157.536		85.2244		118.933		33.0036	59.1767	47.2652		21.5422	22.8723	21.105			61.3912		59.207	17.5162		156.667				75.6865	37.7477	32.014			18.6451
			0.34	44.5888	30.0611	11.0882	48.3222			29.429		91.951		30.3858	95.9087	63.1955	35.3499			98.3046		111.864		140.91		29.848	63.5085	44.4149	19.6527	26.683	8.40365	79.135			66.7338		56.7576	23.2398		125.76				61.4503	35.511	27.2171			22.4537
			0.35	61.128	19.5023	38.067	51.1227			9.9586		99.8102		45.1714	141.046	83.0248	44.947			54.6806		109.334		145.761		37.3845	48.4478	38.8784	29.1075	33.1506	7.01313	70.3906			51.1675		64.135	20.506		127.218				60.1275	34.1292	24.4208			31.3121
			0.36	52.0008	16.3296	25.595	35.8518					93.021		41.6384	149.274	79.5273	20.2078			34.775	19.2452	81.7552		160.444	17.9047	27.7142	54.6706	41.9532	33.6097	33.0489	20.1882	33.975			42.8468		68.657	8.5546		147.135				76.2863	30.1407	20.9033			49.8685
			0.37	54.2984	22.4267	11.2074	16.263					67.8053		43.9046	128.983	71.4035	14.2315			52.786	22.1384	83.5952		140.67	25.578	25.6176	45.2118	22.4021	38.5414	35.5427	10.4545	27.1328	17.3108		30.926		74.0028		14.7934	156.871				87.4567	32.1917	28.559			66.4079
			0.38	63.8154	22.1209	22.5612						65.5946		44.343	100.902	84.366				60.7942	30.9799	96.5835		106.666	21.9304	30.3935	26.8301	13.3772	35.8694	42.9364	14.5101	10.046	21.7672		33.1798		74.5788		35.3312	132.828				73.468	37.8833	25.0726			64.098
			0.39	54.6337	20.0668	22.3794						36.1597		51.2964	88.6688	68.3037				41.203	40.4445	78.8383		128.624	20.4915	22.1296	24.2355	16.4425	30.9306	55.9855	20.8915	17.7922	26.4246		34.108		67.7616		61.297	87.5532				52.3328	39.9708	35.7428			59.7119
			0.4	43.1902		27.3303					7.32468	28.8077		65.7242	50.5915	47.2257				25.5418	29.5243	72.6983		99.6595	24.2103	18.3333	26.9593	18.4316	28.4676	70.8997	14.2254	39.7712	30.106		18.8438		82.2312		58.8932	63.5996			16.9078	74.1008	40.7542	36.6286			33.4798
			0.41	36.5123		23.9832					24.0226	44.0346		102.98	22.0024	36.4672				17.6956	19.0023	52.9688		102.059	23.0308		28.9395	23.0559	19.0226	70.9988	18.2021	56.7716	34.4616		24.9564	12.901	130.448		123.694	87.0716			22.4659	69.2625	57.43	35.1879			22.0979
			0.42	37.4949		14.9435					32.5735	42.3192		107.76	10.2203	25.425			7.0745	23.5802	15.1653	28.1668		46.9668	30.1845		16.7382	19.3549	24.123	61.3092	27.6905	54.2982	22.5726		34.9882	29.949	112.674		146.815	85.0194			20.7359	50.427	59.0408	31.1475			10.8234
			0.43	46.3233							21.8703	45.4895		90.473		21.849			23.8628	33.959	19.7449	9.668		18.2248	32.8264				28.8469	60.3814	33.1435	40.4284	13.2397		31.3206	67.0298	98.4654		109.778	69.3178			20.4057	33.1895	52.4352	22.3383			13.7827
			0.44	55.744							22.9478	43.0892		76.7292		17.761			46.6281	26.6724	31.3788				39.2938				25.0744	53.3043	35.7577	20.992			15.3585	92.7482	50.982		96.2556	65.573			25.4245	55.1922	39.063	17.8761			29.0852
			0.45	43.2836				16.4006			17.7831	43.47		86.6712					22.2451		27.3507				37.903				22.4305	50.9975	33.5665	21.1504				73.0482	24.0896		74.6463	95.6962			29.5496	80.9268	42.2585				50.3297
			0.46	26.7225				22.2472				52.1183		66.0495					7.0717		20.8702				49.637				19.1179	46.4228	32.5941	25.3468				70.4183	20.9022		79.6784	112.454			32.0761	73.2297	68.468				49.6923
			0.47	14.5067				15.7687				66.4865		52.133							20.4732				53.2953					36.7405	26.8042	25.6634				90.4008	12.033		66.3897	112.949			37.6421	63.0385	78.1735				37.5739
			0.48					16.4923				55.267		44.8102							14.9704				62.0902					35.4099	36.7061	13.2306				83.3042			40.7352	95.419			38.1672	42.3535	76.336				43.6752
			0.49					14.2272				38.7568		40.2012											50.518					35.0457	22.2802	23.8314				70.194			24.6882	73.018			40.7333	17.9125	61.442				41.4876
			0.5					19.8256				26.8525		28.302											106.483					29.9495	13.4087	24.1367				40.235			21.085	55.2717			37.4207		57.2767				31.1981
			0.51					30.0705				23.526		22.7648											115.931					21.8735		27.5768				33.5936			12.9693	48.2884			45.7398		46.997				20.1279
			0.52					18.6957				17.2152		17.1408											69.8278					27.9024		23.0686				45.098				42.3428			35.9446		39.675
			0.53									28.9967													74.8428					23.818		17.6414				52.9034				38.9188			38.6621		43.3555
			0.54									43.516													58.7323					29.4358						27.6898				28.1838			39.4083		48.7123
			0.55									32.117													47.9455					34.4334						11.3044				21.23			33.9591		50.893
			0.56									14.6895													40.5285					30.4322										15.842			33.2907		32.2697
			0.57																						31.0756					22.2587													32.242		20.5535
			0.58						15.3792																35.317					12.7148													28.1936		9.10225
			0.59						22.2959																29.5135																		25.2156
			0.6						20.3603																19.181																		24.8268
			0.61						14.4531																																		22.8126
			0.62						17.4464																																		11.5046
			0.63						18.031
			0.64						22.9804
			0.65						29.5722
			0.66						25.094
			0.67						28.7028
			0.68						25.9134
			0.69						27.6529
			0.7						33.6638
			0.71						35.9269
			0.72						36.7616
			0.73						25.2691
			0.74						26.4649
			0.75						17.9019
			0.76
			0.77
			0.78
			0.79
			0.8
			0.81
			0.82
			0.83
			0.84
			0.85
			0.86
			0.87
			0.88
			0.89
			0.9
			0.91
			0.92
			0.93
			0.94
			0.95
			0.96
			0.97
			0.98
			0.99
			1
				1106.16	251.201	184.139	753.808	136.18	427.229	1411.85	113.968	1568.31		1055	1331.69	902.106	319.571	106.311	99.8092	1008.07	294.18	983.944		1504.33	1099.73	279.121	639.917	466.577	335.409	1073.22	456.499	668.129	150.607		874.452	788.715	1088.94	1270.9	953.169	2636.72		660.034	679.123	1665.36	1441.43	639.765			946.646
				626.159	71.2006	24.1393	333.808		87.2293	971.85	13.9681	968.305		674.999	991.689	482.106	99.5706	26.3111	19.8092	628.069	54.1803	663.944		1124.33	619.729	79.1208	319.917	186.577	95.4089	493.222	56.4995	248.129	30.6072		474.452	508.715	728.939	770.901	673.169	1936.72		300.034	239.123	1145.36	721.435	159.765			366.646
[truncated: 44 more columns]

## Sheet: Fig5
Figure 5E-G					Figure 5H-J
E17.5_LGN KO_ WT_T0	E17.5_LGN KO_ WT_T12	E17.5_LGN KO_Homo_T0	E17.5_LGN KO_Homo_T12		E17.5_AGS3 KO_WT_T0	E17.5_AGS3 KO_WT_T12	E17.5_AGS3 KO_Homo_T0	E17.5_AGS3 KO_Homo_T12
1.587	0.28	2.863	4.212		8.651	0.959	0.623	0.336
8.216	1.496	75.367	52.446		3.84	1.244	1.462	1.082
8.876	1.58	41.33	7.372		5.91	1.333	5.937	1.672
4.337	1.586	13.158	10.442		25.517	1.371	2.765	1.695
30.291	1.694	0.389	4.049		5.275	1.574	7.91	3.223
1.22	1.843	57.129	5.898		2.145	1.623	8.317	4.584
0.954	1.904	32.171	12.044		6.451	1.865	6.266	5.827
2.889	2.204	31.395	60.428		13.027	2.063	14.617	6.433
5.028	2.658	71.299	67.653		1.512	2.195	0.403	6.989
2.824	2.761	0.175	1.147		3.98	2.471	12.156	8.299
1.86	3.064	58.14	2.423		2.955	2.638	18.9	9.241
3.397	3.987	13.931	0.016		28.233	2.842	3.81	9.525
8.537	4.292	76.975	68.859		2.786	2.899	11.62	10.324
1.555	4.415	69.352	72.786		3.773	2.949	0.335	11.823
3.209	6.536	33.562	38.3		3.387	3.021	2.603	13.144
6.828	8.657	50.028	1.814		13.215	3.111	4.294	13.797
7.844	8.929	8.425	6.388		21.745	3.113	3.164	14.132
6.202	9.273	6.925	1.726		23.624	3.657	1.798	16.311
2.839	10.14	9.229	7.505		1.76	4.038	9.179	16.787
36.964	10.337	51.967	21.88		26.047	4.126	3.025	17.5
37.686	11.698	3.854	2.617		2.677	4.307	14.241	20.42
15.193	15.711	4.686	1.707		34.502	4.683	20.123	22.08
36.526	15.903	37.75	2.968		9.722	4.736	40.151	22.335
53.614	17.155	5.6	8.385		26.291	4.881	16.606	27.995
37.584	18.939	4.459	2.254		11.288	5.143	28.209	30.092
1.618	19.092	1.554	7.921		4.037	5.202	9.91	32.329
2.114	19.317	3.349	8.36		2.31	5.301	16.125	32.959
15.788	20.754	14.015	10.954		8.278	5.392	31.874	37.552
48.638	21.982	8.439	8.437		13.463	5.656	46.835	45.457
44.224	23.256	11.717	8.298		18.371	6.006	21.555	46.112
16.775	34.686	64.886	46.815		3.282	6.257	19.558	46.563
57.074	40.412	27.855	7.057		2.999	6.477	30.043	47.579
32.087	68.741	6.707	4.95		1.456	6.611	34.285	57.167
37.199	71.095	32.58	11.228		6.6	6.717	50.859	58.324
80.724	71.455	4.796	3.234		4.972	6.767	64.988	60.521
21.246	71.914	82.923	83.304		4.156	6.788	64.592	60.58
77.138	74.37	1.088	9.303		3.283	6.826	69.958	62.704
75.955	77.868	6.67	10.298		21.044	7.829	45.81	63.255
81.994	78.053	7.435	10.125		28.275	8.856	63.64	63.774
72.631	78.353	8.13	19.416		33.14	9.166	65.643	63.848
51.912	78.878	26.002	9.282		6.256	10.888	67.53	64.337
63.391	79.796	31.535	20.342		5.836	11.784	46.114	64.596
40.479	79.921	3.814	5.281		1.764	11.822	70.454	64.943
54.607	80.263	74.055	22.233		37.486	12.288	67.29	65.717
79.525	80.594	2.064	2.121		1.697	12.568	63.423	65.8
82.28	82.182	12.37	2.82		12.59	12.929	69.083	66.018
84.79	82.95	1.712	17.526		36.412	14.046	35.105	66.102
82.527	84.343	1.77	13.767		0.914	15.076	68.722	66.627
85.266	84.992	14.612	6.34		1.657	15.482	36.714	67.675
89.621	85.19	36.87	25.622		32.748	15.989	52.046	68.236
88.182	85.819	3.116	9.89		0.32	17.134	45.445	68.612
34.702	86.092	6.984	3.276		7.129	20.148	78.185	71.513
77.672	86.365	13.465	1.526		19.949	21.618	74.068	72.641
86.711	87.985	13.335	10.561		10.791	22.93	54.056	73.155
88.713	88.65	31.403	4.086		37.031	24.39	51.477	73.332
85.984	88.793	35.218	25.787		8.886	24.634	40.387	74.494
78.607	89.417	4.043	3.473		33.869	26.169	79.636	75.834
83.43	89.984	82.09	63.487		27.203	28.841	67.917	76.583
		10.482	7.228		52.532	29.768	87.285	76.905
		3.504	1.884		29.827	38.521	79.027	77.548
		26.75	11.76		42.5	39.541	62.582	77.987
		8.427	3.683		31.857	40.53	88.873	79.083
		4.236	7.595		51.549	43.464	89.615	79.141
		2.643	6.788		35.02	46.096	86.777	79.261
		12.201	6.42		21.442	46.521	78.577	79.513
		1.236	3.504		24.92	48.896	81.547	80.108
					50.263	50.298	81.345	80.278
					21.162	52.402	85.046	80.355
					59.797	55.366	81.075	81.372
					58.117	57.658	41.987	81.501
					30.371	62.359	86.761	81.87
					83.693	63	83.577	83.538
					20.991	63.148	73.643	83.733
					33.012	64.02	73.681	84.078
					85.928	64.306	89.388	85.82
					64.023	65.516	85.292	86.098
					38.465	65.554	48.456	86.554
					63.059	67.536	87.337	86.623
					57.617	67.84	78.003	87.101
					86.458	69.445	83.113	87.477
					81.828	70.425	68.768	87.676
					68.473	71.159	56.609	87.798
					68.57	71.551	85.972	88.201
					51.093	71.664	74.738	88.675
					77.335	71.982	84.392	89.044
					52.228	72.071	87.172	89.833
					79.087	72.32	82.743	89.948
					67.823	73.339
					58.12	73.759
					64.714	73.943
					55.499	73.973
					81.481	74.661
					71.465	74.955
					89.839	74.963
					72.617	75.11
					49.611	75.673
					67.025	75.752
					83.465	76.473
					65.369	76.644
					76.481	76.692
					74.804	76.706
					81.884	76.968
					87.796	77.73
					83.884	77.735
					74.669	78.006
					69.728	78.617
					74.075	79.044
					66.693	79.447
					85.49	80.415
					85.788	80.561
					71.831	80.701
					68.822	80.766
					82.547	80.877
					61.831	81.146
					80.148	81.678
					75.452	81.818
					65.056	82.054
					64.334	83.261
					75.855	83.831
					85.7	84.328
					57.887	86.167
					86.966	86.512
					75.526	86.673
					86.191	86.688
					53.292	86.782
					71.239	86.786
					79.57	86.997
					84.197	88.069
					89.528	88.277
					74.923	88.572
					85.404	89.158
					83.176	89.585
					89.426	89.955

## Sheet: Fig6
Figure 6B				Figure 6C-E					Figure 6F
E17.5_LGN KO_Gpsm1 1147 RFP-_All	E17.5_LGN KO_Gpsm1 1147 RFP+_All	E17.5_LGN KO_AGS3 KO_All		E17.5_LGN KO_Homo_T0	E17.5_LGN KO_Homo_T12	E17.5_LGN AGS3 KO_Homo Homo_T0	E17.5_LGN AGS3 KO_Homo Homo_T12		E14.5_All_Gpsm1 1147 RFP-	E14.5_All_Gpsm1 1147 RFP+
67.63	32.65	41.64		2.863	4.212	4.924	1.2		9.03	14.5123
15.31	31.27	4.47		75.367	52.446	34.966	12.804		7.2	29.84
57.52	37.43	9.068		41.33	7.372	8.216	8.801		12.44	3.8141
15.418	7.91	15.31		13.158	10.442	16.722	80.196		49.94	3.71
2.75	82.75	3.209		0.389	4.049	9.792	14.744		47.41	4.5
22.58	27.1	4.74		57.129	5.898	6.773	0.757		22.28	88.6
51.84	88	66.519		32.171	12.044	10.443	4.174		24.12	62.03
13.3	11.38	13.49		31.395	60.428	5.973	14.754		56.34	25.41
8.62	2.42	6.257		71.299	67.653	35.487	16.688		17.67	1.92
1.14	19.69	6.59		0.175	1.147	15.12	0.719		32.96	32.39
4.03	34	9.46		58.14	2.423	3.004	2.131		9.22	86.98
2.49	29.88	14.12		13.931	0.016	63.393	29.732		32.63	44.28
9.57	15.78	6.23		76.975	68.859	60.273	28.759		30.02	14.5123
87.61		20.96		69.352	72.786	22.075	22.305		82.44	29.84
36.91	10.731	29.589		33.562	38.3	74.975	52.194		6.17	3.8141
9.72	3.759	40.589		50.028	1.814	1.132	4.595		15.04	3.71
3.57	7.565	6.43		8.425	6.388	1.862	1.084		62.87	4.5
19.32	12.902	1.65		6.925	1.726	10.902	3.601		26.78	88.6
17.06	4.491	40.11		9.229	7.505	80.412	1.768		71.06	62.03
14.206	28.88	8.52		51.967	21.88	2.041	13.066		80.82	25.41
6.106	89.385	5.7		3.854	2.617	70.063	36.867		78.17	1.92
4.715	78.597	29.44		4.686	1.707	2.541	3.715		67.19	32.39
22.802	33.797	10.539		37.75	2.968	78.994	57.08		17.59	86.98
16.019	19.595	14.342		5.6	8.385	25.125	4.715		13.91	44.28
13.589	29.09	3.1		4.459	2.254	5.565	17.131		3.45	6.64
3.759	12.882	62.331		1.554	7.921	43.855	22.979		13.09	1.06
3.49	44.175	3.13		3.349	8.36	0.84	1.579		13.1	4.2
2.893	61.22	4.05		14.015	10.954	7.578	12.326		57.85	73.74
4.92	54.091	7.53		8.439	8.437	85.789	59.96		6.12	87.62
25.395	4.85	3.95		11.717	8.298	3.205	15.831		50.49	15.36
15.405	2.627	6.84		64.886	46.815	6.877	2.178		15.1	78.62
39.785	6.071	80.41		27.855	7.057	67.452	2.438		5.21	41.32
66.94	5.476	10.832		6.707	4.95	2.613	4.343		9.14	39.74
6.177	62.443	1.631		32.58	11.228	1.215	6.566		13.85	15.64
8.088	4.973			4.796	3.234	68.703	9.671		69.83	53.1
10.41	3.526			82.923	83.304	77.43	14.02		22.81	11.6
5.116	9.64			1.088	9.303	1.385	0.507		4.5	9.36
6.88	17.059			6.67	10.298	3.913	10.484		4.66	21.69
12.983	38.43			7.435	10.125	6.996	10.152		6.66	37.82
28.148	2.112			8.13	19.416	72.63	16.875		87.74	15.44
24.453	31.962			26.002	9.282	51.231	22.758		21.43	33.46
45.573	10.083			31.535	20.342	2.498	3.927		57.55	54.3
2.837	71.012			3.814	5.281	8.067	5.1		12.96	4.51
56.544	25.465			74.055	22.233	1.515	6.255		45.73	8.8
4.365	40.232			2.064	2.121	22.681	2.68		87.43	8.95
73.171	42.198			12.37	2.82	44.795	37.22		82.92	16.94
4.023	44.415			1.712	17.526	8.192	5.409		72.31	7.38
8.815	9.742			1.77	13.767	3.007	3.496		43.78	12.4
29.55	5.978			14.612	6.34	43.257	21.615		53.21	31.99
89.841	3.517			36.87	25.622	5.205	1.622		4.68	80.92
19.973	4.444			3.116	9.89	9.242	0.994		79.22	75.75
11.54	19.973			6.984	3.276	8.71	35.005		51.66	49.66
6.379	8.837			13.465	1.526	7.831	37.193		42.17	9.23
				13.335	10.561	89.013	20.228		47.69	11.25
				31.403	4.086	77.45	50.207		79.8	42.29
				35.218	25.787	27.779	7.194		66.01	6.95
				4.043	3.473	0.993	2.662		10.51
				82.09	63.487				32.74
				10.482	7.228				11.8
				3.504	1.884				88.05
				26.75	11.76				69.21
				8.427	3.683				44.1
				4.236	7.595				85.9
				2.643	6.788				64.01
				12.201	6.42				8.74
				1.236	3.504				56.24
									44.2
									31.25
									24.19

## Sheet: Fig7A-D
Figure 7B					Figure 7D					Figure 7G						Figure 6.D
E15.5_All_AGS3 KO_WT	E15.5_All_AGS3 KO_Homo	E17.5_All_AGS3 KO_WT	E17.5_All_AGS3 KO_Homo		E15.5_All_LGN KO_WT	E15.5_All_LGN KO_Homo	E17.5_All_LGN KO_WT	E17.5_All_LGN KO_Homo			ACD (n)	ACD (%)	SCD				ACD	SCD
6.65137	8.36521	42.1555	53.1359		14.3484		30.0562	32.1437		E17.5_AGS3 KO (-/+)	23.8095		76.1905			E17.5_LGN KO (+/+)	62.7907	37.2093
	9.36195	39.7057	50.1618		12.3921	15.7744	30.4559	28.018		E17.5_AGS3 KO (-/-)	62.1951		37.8049			E17.5_LGN KO (-/-)	12.381	87.619
6.05748	7.5993	48.5421	44.3175		13.872	12.0355	32.823	34.4231								E17.5_LGN KO (-/-); AGS3 KO (-/-)	18.5185	81.4815
7.59776	11.3636	42.1711	39.8947		14.4916	15.276	27.8399	31.1689
	13.2682	33.0489	39.8414		15.9972	13.0529	28.7601	26.4035
7.70327	6.59864	42.6695	54.0379		13.5089	15.3274	28.1517	33.4302
8.32175	5.72798	39.6714	46.9673		16.2739		28.6118	26.1472
8.96623	5.4224	44.2242	46.5024			14.4085	29.2023	26.8842
7.72973	6.91582	34.7064	43.393		16.6086	15.7942	35.7293	27.052
8.45092	7.25591	35.0541	44.8971		13.5451		41.6608	30.6839
	7.28337	32.6562	42.5433			14.1691	36.4999	25.8673
	9.84971	36.052	40.9083					22.4161
8.18602	8.88952	43.6755	49.1085		13.6563	15.4854	40.272	28.4533
	9.4274	37.8924	44.7628				30.6866	33.1546
9.41371	9.7592	31.2516	49.1947			15.7052	26.5468	30.6785
8.94428	10.0166	37.2327	64.1796		14.9642	15.4117		29.9132
10.4762	9.66434	25.4862	46.1351		15.3386	18.3711	29.5647	28.0741
	8.7287	31.4302	52.9017		15.2574	16.5609	26.228	30.5946
10.2293	8.87783	36.6351	38.6659		15.7179		33.6799	32.2792
10.3376	8.21478	45.4586	43.2622			14.0156	30.2598	33.1302
		42.224	43.4595			16.1468	29.6469	33.3168
	9.91275	36.4522	46.1772		16.2188	15.8938	31.2792	28.1861
10.3081	4.28249	48.3374	48.3104				28.1297	38.124
8.7881	6.39185	50.9068	33.8049		15.1872	16.1942	29.3438
8.58713	3.98811	47.9577	42.2361		13.8681	17.2601	31.1763
7.29176	7.34548	48.9545	37.3624			17.9218	26.6092	29.0001
8.70116	7.90927	44.8272	54.1025		17.1166	18.1459	30.1185	30.2313
	5.65487	50.1217	38.2256		16.1182		37.6011	27.0108
8.10584	8.25341	36.9008	49.8355			15.6972	39.062	23.8729
8.53962	7.26594		52.4657		14.6731	14.9271	41.7795	24.0204
	9.57763	57.8845			14.9953		44.0353	34.034
8.92171	8.3764	53.5882	51.221			17.03		35.5473
9.67291	9.67268	45.5962	48.8414		18.2361	15.808	56.3816
11.5457	7.57671	48.9457	56.828		16.3855	19.2154	41.7121	40.4322
10.2526	10.6185	52.9289	75.2417		16.1589	18.5451	53.4915	33.257
10.3125	8.24037	38.9342	53.9142		15.4738	17.1496	43.2799	30.3969
	9.30718	46.2886			14.6572	16.9505	40.6455	30.7713
	8.32812	45.0749	51.6831		14.5712	15.244		33.1719
10.0484	7.21352	47.4419	63.811		15.0185	15.6201		36.1019
9.72074	8.6051	50.4783	57.5161		14.2888	16.2938		24.696
9.34101	7.08291		61.1088		21.3168	14.867		26.1556
8.13812	6.73342	50.9043	42.7535		21.8024			27.1178
9.80462	7.2705	44.1959	47.2374			17.1598		27.6542
7.5594	7.51638	42.8841	49.9871		22.4019	18.0644		30.5587
7.55662	7.3152	44.1369	48.7433		22.7936	17.2453		28.7042
6.65855	7.21183	38.006	61.8772			14.0134		29.3024
8.46954		43.7116	56.8951			18.3601		33.4841
	6.66004	34.5388	47.6865		20.9413	18.566		24.5504
		32.4964	58.3337		22.0651	19.3175		30.8647
		32.6878	47.8584		20.6344	17.9409		39.0915
6.13968		31.8756	53.8315		19.1299	18.7673		37.3012
7.33135		35.0596	45.3275			19.5188		32.6056
6.61628		30.5939				21.5677		31.3781
8.25419			48.6403			20.5281		28.9398
9.03574		38.6348	48.5623		18.1305			23.5692
10.5274		31.1805	45.7201			21.4375		21.745
8.77247		44.2987	47.1764			18.5138		24.9057
9.02655		32.5646	48.222		19.848	19.9092		25.2343
9.4562		26.9513	51.4712		22.3576	21.4287		26.0449
8.80465		36.1311	54.7688		17.0393	20.9444		24.9576
7.34092		36.2377	41.3055		21.0454	19.5282		27.143
8.02638		37.8562	37.8648		18.9396			33.416
		35.8012	42.9561		20.4196	20.4193		24.6552
8.29574		33.2883	52.521		18.7084	19.9355		25.591
10.2433			51.177		22.8263	19.7259		24.0896
11.6728		34.1092	41.3944		20.5164	18.999		24.0879
		34.4803	50.6656			17.8143		28.3705
		37.2515	45.2914		23.2135	17.8668		20.718
7.59273		41.9533	47.2771		23.0589			25.3161
10.4469		40.1791			23.8879	18.8107		28.1188
10.5398		49.6927	42.3979		21.548	17.945		20.4539
9.04636		48.1262	45.7514			19.9161
9.63616		48.3086	40.5406			23.2154
8.75349			36.5131		16.8975	16.2523
7.06795			42.1354		19.0859	17.7594
6.85047			38.1831			18.545
6.33619			38.5186		19.8404	16.5033
			33.2554		16.5874	17.0041
			37.9478		18.4663	16.9858
7.55419			42.1854		18.7308
8.14453			37.13
8.62426			46.724
8.56334			48.8747
8.45402			41.9164
7.15281			40.4162
8.53342			49.6609
6.42785
7.758

[truncated: 1 more sheets: Fig7E-I]
